# Supplementary material for: A platinum standard pan-genome resource that represents the population structure of Asian rice
Source: PubMed Central journal article supplement (PMC7138821; doi:10.1038/s41597-020-0438-2), 2020-04-07
Supplement: 41597_2020_438_MOESM1_ESM.pdf [file 41597_2020_438_MOESM1_ESM.pdf]

## 1 **Supplementary Information**

### 2 **Supplementary Tables**

3 **Supplementary Table 1.** Summary of Illumina genome survey sequences for 12 *Oryza*  
4 *sativa* genomes.

5 **Supplementary Table 2.** Genome features of *de novo* assemblies for 12 *Oryza sativa*  
6 accessions by Canu1.5, FALCON and MECAT2.

7 **Supplementary Table 3.** Genome features of 12 *Oryza sativa* accessions by GPM  
8 editing.

9 **Supplementary Table 4.** Chromosome length (Mb) of 12 *Oryza sativa* genomes.

10 **Supplementary Table 5.** Bionano optical map statistics of 12 *Oryza sativa* genomes.

11 **Supplementary Table 6.** Summary of large structural variation (50-25,000 bp) by  
12 comparison of each of 16 genomes to every other genome (including 12 genomes from  
13 this study and 4 previously reported: MH63, ZS97, N 22 and the IRGSP RefSeq).

### 14 **Supplementary Figures**

15 **Supplementary Figure 1.** Admixture results for K=5 to 15. The samples are grouped  
16 according to the new classification. At K=9,12,13, the Q matrices converged to two  
17 different modes, differing according to whether ind1A is split, or tropical japonica.

18 **Supplementary Figure 2.** Length distribution of PacBio long reads used for 12 *Oryza*  
19 *sativa* genome assemblies.

20 **Supplementary Figure 3.** K-mer analysis of Illumina short sequences that were used for  
21 genome size estimation with the GCE program.

22 **Supplementary Figure 4.** Bionano Access visualization view for 12 *de novo* assemblies  
23 with Bionano optical maps and their underlying alignments.

24 **Supplementary Figure 5.** Summary of missing genes in the BUSCO gene space  
25 evaluation of 12 *de novo Oryza sativa* assemblies, 4 public *Oryza sativa* PSRefSeqs and  
26 3 high-quality *Zea mays* genomes.

Supplementary Table 1.

| Variety Name                     | Illumina<br>Total (bp) | Genome Size (bp)<br>Kmer = 14 | Illumina<br>Depth (X) |
|----------------------------------|------------------------|-------------------------------|-----------------------|
| CHAO MEO::IRGC 80273-1           | 38,600,557,632         | 396,965,000                   | 97.24                 |
| Azucena                          | 13,506,028,120         | 390,284,000                   | 34.61                 |
| KETAN NANGKA::IRGC 19961-2       | 51,046,107,492         | 393,783,000                   | 97.59                 |
| ARC 10497::IRGC 12485-1          | 42,487,266,828         | 411,065,000                   | 103.36                |
| IR 64                            | 11,089,683,636         | 378,699,000                   | 29.28                 |
| PR 106::IRGC 53418-1             | 41,312,634,506         | 427,654,000                   | 96.60                 |
| LIMA::IRGC 81487-1               | 44,393,932,352         | 427,905,000                   | 103.75                |
| KHAO YAI GUANG::IRGC 65972-1     | 36,515,938,608         | 452,866,000                   | 80.63                 |
| GOBOL SAIL (BALAM)::IRGC 26624-2 | 35,404,680,382         | 414,841,000                   | 85.35                 |
| LIU XU::IRGC 109232-1            | 47,436,101,266         | 420,565,000                   | 112.79                |
| LARHA MUGAD::IRGC 52339-1        | 44,349,661,870         | 404,289,000                   | 109.70                |
| NATEL BORO::IRGC 34749-1         | 43,746,343,786         | 372,517,000                   | 117.43                |

## Supplementary Table 2.

| Assemblers                    | Fetures                       | CHAO MEO::IRGC 80273-1 | Azucena                | KETAN NANGKA::IRGC 19961-2 | ARC 10497::IRGC 12485-1 | IR 64                 | PR 106::IRGC 53418-1  | LIMA::IRGC 81487-1    | KHAO YAI GUANG::IRGC 65972-1 | GOBOL SAIL (BALAM)::IRGC 26624-2 | LIU XU::IRGC 109232-1 | LARHA MUGAD::IRGC 52339-1 | NATEL BORO::IRGC 34749-1 |
|-------------------------------|-------------------------------|------------------------|------------------------|----------------------------|-------------------------|-----------------------|-----------------------|-----------------------|------------------------------|----------------------------------|-----------------------|---------------------------|--------------------------|
|                               | Number of sequences           | 152                    | 1432                   | 51                         | 111                     | 542                   | 73                    | 137                   | 88                           | 77                               | 758                   | 144                       | 51                       |
|                               | Total size of sequences       | 385,300,312 bp.        | 426,854,248 bp.        | 384,182,251 bp.            | 382,632,343 bp.         | 450,675,276 bp.       | 394,777,416 bp.       | 406,108,421 bp.       | 398,327,588 bp.              | 394,382,542 bp.                  | 496,174,224 bp.       | 396,786,868 bp.           | 381,520,998 bp.          |
|                               | Longest sequence              | 19,303,668 bp.         | 13,316,004 bp.         | 29,546,610 bp.             | 26,399,646 bp.          | 11,833,599 bp.        | 31,338,188 bp.        | 27,196,387 bp.        | 32,065,732 bp.               | 29,601,517 bp.                   | 38,163,182 bp.        | 32,133,799 bp.            | 31,694,912 bp.           |
|                               | Shortest sequence             | 31,263 bp.             | 53 bp.                 | 33,228 bp.                 | 25,840 bp.              | 4,470 bp.             | 71,365 bp.            | 60,302 bp.            | 62,199 bp.                   | 56,816 bp.                       | 30,651 bp.            | 5,557 bp.                 | 42,889 bp.               |
| canu                          | Number of sequences > 500 nt  | 152 (385,300,312 bp.)  | 1428 (426,853,447 bp.) | 51 (384,182,251 bp.)       | 111 (382,632,343 bp.)   | 542 (450,675,276 bp.) | 73 (394,777,416 bp.)  | 137 (406,108,421 bp.) | 88 (398,327,588 bp.)         | 77 (394,382,542 bp.)             | 758 (496,174,224 bp.) | 144 (396,786,868 bp.)     | 51 (381,520,998 bp.)     |
|                               | Number of sequences > 1k nt   | 152 (385,300,312 bp.)  | 1421 (426,847,636 bp.) | 51 (384,182,251 bp.)       | 111 (382,632,343 bp.)   | 542 (450,675,276 bp.) | 73 (394,777,416 bp.)  | 137 (406,108,421 bp.) | 88 (398,327,588 bp.)         | 77 (394,382,542 bp.)             | 758 (496,174,224 bp.) | 144 (396,786,868 bp.)     | 51 (381,520,998 bp.)     |
|                               | Number of sequences > 10k nt  | 152 (385,300,312 bp.)  | 1247 (425,796,067 bp.) | 51 (384,182,251 bp.)       | 111 (382,632,343 bp.)   | 541 (450,670,806 bp.) | 73 (394,777,416 bp.)  | 137 (406,108,421 bp.) | 88 (398,327,588 bp.)         | 77 (394,382,542 bp.)             | 758 (496,174,224 bp.) | 142 (396,775,025 bp.)     | 51 (381,520,998 bp.)     |
|                               | Number of sequences > 100k nt | 95 (381,554,518 bp.)   | 204 (385,954,685 bp.)  | 43 (383,650,997 bp.)       | 69 (379,988,479 bp.)    | 274 (432,659,071 bp.) | 61 (393,767,794 bp.)  | 111 (403,956,780 bp.) | 74 (397,211,223 bp.)         | 68 (393,677,326 bp.)             | 541 (478,029,256 bp.) | 59 (391,718,277 bp.)      | 35 (380,362,503 bp.)     |
|                               | Number of sequences > 1M nt   | 53 (370,549,910 bp.)   | 96 (352,401,999 bp.)   | 27 (380,102,219 bp.)       | 51 (376,259,174 bp.)    | 102 (387,243,850 bp.) | 27 (387,700,820 bp.)  | 35 (387,829,465 bp.)  | 35 (389,640,858 bp.)         | 34 (385,829,226 bp.)             | 70 (371,155,003 bp.)  | 35 (385,063,650 bp.)      | 24 (378,301,198 bp.)     |
|                               | Mean sequence length          | 2,534,870.00           | 298,082.00             | 7,532,985.00               | 3,447,138.00            | 831,504.00            | 5,407,909.00          | 2,964,295.00          | 4,526,449.00                 | 5,121,851.00                     | 654,583.00            | 2,755,464.00              | 7,480,803.00             |
|                               | Median sequence length        | 154,148.5 bp.          | 33,929.5 bp.           | 3,371,535 bp.              | 260,726 bp.             | 101,136.5 bp.         | 170,322 bp.           | 163,678 bp.           | 195,127 bp.                  | 401,049 bp.                      | 137,828.5 bp.         | 82,020 bp.                | 317,268 bp.              |
|                               | N50 sequence length           | 9,716,915 bp.          | 3,888,558 bp.          | 17,707,699 bp.             | 9,934,016 bp.           | 3,959,778 bp.         | 20,999,472 bp.        | 14,262,161 bp.        | 17,266,774 bp.               | 15,685,983 bp.                   | 5,977,894 bp.         | 17,747,777 bp.            | 21,678,103 bp.           |
|                               | L50 sequence count            | 15                     | 35                     | 9                          | 12                      | 33                    | 8                     | 11                    | 10                           | 10                               | 18                    | 8                         | 7                        |
|                               | Number of sequences           | 1,473.00               | 104                    | 447                        | 1,484.00                | 1226                  | 681                   | 647                   | 586                          | 603                              | 749                   | 712                       | 539                      |
| Total size of sequences       | 417,964,237 bp.               | 384,739,691 bp.        | 397,017,154 bp.        | 417,858,139 bp.            | 462,958,049 bp.         | 424,682,512 bp.       | 425,971,071 bp.       | 415,255,023 bp.       | 418,006,874 bp.              | 463,520,710 bp.                  | 418,962,941 bp.       | 403,797,739 bp.           |                          |
| Longest sequence              | 6,043,249 bp.                 | 31,965,826 bp.         | 17,654,262 bp.         | 6,506,933 bp.              | 6,461,080 bp.           | 18,987,500 bp.        | 21,189,681 bp.        | 15,630,036 bp.        | 25,154,512 bp.               | 10,984,374 bp.                   | 21,196,415 bp.        | 19,949,698 bp.            |                          |
| Shortest sequence             | 243 bp.                       | 1,510 bp.              | 1,305 bp.              | 340 bp.                    | 367 bp.                 | 1,077 bp.             | 307 bp.               | 43 bp.                | 1,403 bp.                    | 0 bp.                            | 362 bp.               | 733 bp.                   |                          |
| Number of sequences > 500 nt  | 1472 (417,964,994 bp.)        | 104 (384,739,691 bp.)  | 447 (397,017,154 bp.)  | 1483 (417,857,799 bp.)     | 1223 (462,956,743 bp.)  | 681 (424,682,512 bp.) | 645 (425,970,351 bp.) | 585 (415,254,980 bp.) | 603 (418,006,874 bp.)        | 742 (463,520,710 bp.)            | 710 (418,962,103 bp.) | 539 (403,797,739 bp.)     |                          |
| Number of sequences > 1k nt   | 1471 (417,963,457 bp.)        | 104 (384,739,691 bp.)  | 447 (397,017,154 bp.)  | 1483 (417,857,799 bp.)     | 1221 (462,955,381 bp.)  | 681 (424,682,512 bp.) | 643 (425,968,941 bp.) | 583 (415,253,603 bp.) | 603 (418,006,874 bp.)        | 742 (463,520,710 bp.)            | 707 (418,959,311 bp.) | 536 (403,795,287 bp.)     |                          |
| Number of sequences > 10k nt  | 1383 (417,384,090 bp.)        | 103 (384,738,181 bp.)  | 405 (396,770,358 bp.)  | 1381 (417,198,008 bp.)     | 1137 (462,474,043 bp.)  | 642 (424,517,345 bp.) | 599 (425,701,310 bp.) | 537 (414,986,546 bp.) | 553 (417,734,033 bp.)        | 742 (463,520,710 bp.)            | 620 (418,418,022 bp.) | 492 (403,553,154 bp.)     |                          |
| Number of sequences > 100k nt | 383 (377,807,156 bp.)         | 58 (382,027,799 bp.)   | 109 (382,922,790 bp.)  | 413 (379,790,675 bp.)      | 362 (428,819,002 bp.)   | 170 (402,714,933 bp.) | 157 (403,790,785 bp.) | 151 (397,535,932 bp.) | 130 (397,593,735 bp.)        | 382 (444,176,145 bp.)            | 166 (398,730,047 bp.) | 105 (384,697,784 bp.)     |                          |
| Number of sequences > 1M nt   | 130 (277,224,326 bp.)         | 39 (378,370,621 bp.)   | 70 (370,631,657 bp.)   | 134 (272,722,546 bp.)      | 143 (356,145,432 bp.)   | 71 (383,112,141 bp.)  | 79 (386,015,143 bp.)  | 91 (373,127,562 bp.)  | 64 (379,068,674 bp.)         | 106 (352,709,101 bp.)            | 83 (369,447,989 bp.)  | 66 (371,577,588 bp.)      |                          |
| Mean sequence length          | 283,750.00                    | 3,699,420.00           | 888,181.00             | 281,575.00                 | 377,616.00              | 623,616.00            | 658,378.00            | 708,626.00            | 693,212.00                   | 618,852.00                       | 588,431.00            | 749,160.00                |                          |
| Median sequence length        | 42,705 bp.                    | 121,616 bp.            | 51,927 bp.             | 40,515 bp.                 | 51,650 bp.              | 52,979 bp.            | 55,976 bp.            | 52,379 bp.            | 50,373 bp.                   | 102,363 bp.                      | 47,354.5 bp.          | 56,704 bp.                |                          |
| N50 sequence length           | 1,616,332 bp.                 | 16,106,380 bp.         | 6,802,876 bp.          | 1,564,692 bp.              | 2,200,738 bp.           | 7,973,901 bp.         | 7,470,691 bp.         | 4,696,015 bp.         | 7,651,249 bp.                | 3,265,125 bp.                    | 5,662,344 bp.         | 8,020,714 bp.             |                          |
| L50 sequence count            | 78                            | 9                      | 18                     | 84                         | 60                      | 19                    | 19                    | 28                    | 17                           | 40                               | 25                    | 16                        |                          |
| Number of sequences           | 241                           | 116                    | 97                     | 230                        | 501                     | 113                   | 143                   | 116                   | 64                           | 679                              | 193                   | 201                       |                          |
| Total size of sequences       | 375,395,687 bp.               | 378,046,431 bp.        | 382,778,126 bp.        | 377,640,874 bp.            | 418,790,768 bp.         | 395,404,167 bp.       | 400,608,885 bp.       | 367,073,907 bp.       | 393,211,896 bp.              | 446,168,466 bp.                  | 393,508,832 bp.       | 385,696,147 bp.           |                          |
| Longest sequence              | 10,940,410 bp.                | 23,392,999 bp.         | 29,487,693 bp.         | 16,830,803 bp.             | 9,620,289 bp.           | 34,489,834 bp.        | 36,848,924 bp.        | 29,024,776 bp.        | 44,304,478 bp.               | 38,493,727 bp.                   | 29,810,963 bp.        | 31,845,677 bp.            |                          |
| Shortest sequence             | 610 bp.                       | 1,219 bp.              | 1,074 bp.              | 549 bp.                    | 28,131 bp.              | 1,339 bp.             | 1,339 bp.             | 1,598 bp.             | 4,693 bp.                    | 549 bp.                          | 664 bp.               | 691 bp.                   |                          |
| Number of sequences > 500 nt  | 241 (375,395,687 bp.)         | 116 (378,046,431 bp.)  | 97 (382,778,126 bp.)   | 230 (377,640,874 bp.)      | 501 (418,790,768 bp.)   | 113 (395,404,167 bp.) | 143 (400,608,885 bp.) | 116 (367,073,907 bp.) | 64 (393,211,896 bp.)         | 679 (446,168,466 bp.)            | 193 (393,508,832 bp.) | 201 (385,696,147 bp.)     |                          |
| Number of sequences > 1k nt   | 238 (375,393,190 bp.)         | 116 (378,046,431 bp.)  | 97 (382,778,126 bp.)   | 226 (377,637,666 bp.)      | 501 (418,790,768 bp.)   | 113 (395,404,167 bp.) | 143 (400,608,885 bp.) | 116 (367,073,907 bp.) | 64 (393,211,896 bp.)         | 668 (446,160,455 bp.)            | 192 (393,508,168 bp.) | 198 (385,693,696 bp.)     |                          |
| Number of sequences > 10k nt  | 217 (375,281,276 bp.)         | 106 (377,989,173 bp.)  | 83 (382,698,180 bp.)   | 194 (377,488,933 bp.)      | 501 (418,790,768 bp.)   | 99 (395,330,632 bp.)  | 117 (400,468,309 bp.) | 107 (367,032,103 bp.) | 60 (393,184,910 bp.)         | 479 (445,139,776 bp.)            | 166 (393,377,173 bp.) | 143 (385,407,723 bp.)     |                          |
| Number of sequences > 100k nt | 136 (372,059,148 bp.)         | 67 (376,358,737 bp.)   | 37 (380,556,280 bp.)   | 129 (374,884,549 bp.)      | 318 (406,303,185 bp.)   | 34 (392,932,928 bp.)  | 50 (397,830,979 bp.)  | 36 (363,770,126 bp.)  | 33 (391,657,293 bp.)         | 220 (436,276,969 bp.)            | 62 (388,790,002 bp.)  | 37 (380,996,815 bp.)      |                          |
| Number of sequences > 1M nt   | 81 (341,969,740 bp.)          | 51 (368,967,817 bp.)   | 29 (378,617,893 bp.)   | 90 (357,474,872 bp.)       | 122 (331,039,223 bp.)   | 24 (389,615,790 bp.)  | 33 (392,934,938 bp.)  | 25 (359,778,489 bp.)  | 22 (389,148,818 bp.)         | 87 (385,649,883 bp.)             | 47 (385,427,209 bp.)  | 25 (379,394,694 bp.)      |                          |
| Mean sequence length          | 1,557,658.00                  | 3,259,020.00           | 3,946,166.00           | 1,641,916.00               | 835,909.00              | 3,499,151.00          | 2,801,460.00          | 3,164,430.00          | 6,143,935.00                 | 657,096.00                       | 2,038,905.00          | 1,918,886.00              |                          |
| Median sequence length        | 363,408 bp.                   | 504,521 bp.            | 64,332 bp.             | 317,997.5 bp.              | 190,677 bp.             | 39,878 bp.            | 46,818 bp.            | 58,138 bp.            | 116,075.5 bp.                | 30,962 bp.                       | 50,966 bp.            | 29,747 bp.                |                          |
| N50 sequence length           | 5,336,915 bp.                 | 10,440,731 bp.         | 17,584,371 bp.         | 2,737,939 bp.              | 5,089,065 bp.           | 22,469,819 bp.        | 17,639,931 bp.        | 17,840,582 bp.        | 20,803,229 bp.               | 6,899,863 bp.                    | 12,298,593 bp.        | 18,402,708 bp.            |                          |
| L50 sequence count            | 25                            | 13                     | 9                      | 22                         | 46                      | 8                     | 9                     | 8                     | 7                            | 16                               | 12                    | 8                         |                          |

Supplementary Table 3.

| Fetures                               | CHAO<br>MEO::IRGC<br>80273-1 | Azucena             | KETAN<br>NANGKA::IR<br>GC 19961-2 | ARC<br>10497::IRGC<br>12485-1 | IR 64                | PR 106::IRGC<br>53418-1 | LIMA::IRGC<br>81487-1 | KHAO YAI<br>GUANG::IRG<br>C 65972-1 | GOBOL SAIL<br>(BALAM)::IR<br>GC 26624-2 | LIU<br>XU::IRGC<br>109232-1 | LARHA<br>MUGAD::IRG<br>C 52339-1 | NATEL<br>BORO::IRGC<br>34749-1 |
|---------------------------------------|------------------------------|---------------------|-----------------------------------|-------------------------------|----------------------|-------------------------|-----------------------|-------------------------------------|-----------------------------------------|-----------------------------|----------------------------------|--------------------------------|
| Number of sequences                   | 136                          | 53                  | 41                                | 83                            | 128                  | 58                      | 111                   | 61                                  | 49                                      | 588                         | 46                               | 26                             |
| Total size of sequences (bp)          | 384,714,333                  | 381,568,527         | 383,971,120                       | 382,043,555                   | 388,473,696          | 397,125,412             | 407,596,313           | 400,990,151                         | 394,174,378                             | 491,646,357                 | 391,869,245                      | 384,741,818                    |
| Longest sequence (bp)                 | 25,650,153                   | 33,513,758          | 31,738,027                        | 29,525,146                    | 22,593,598           | 39,183,656              | 39,451,588            | 32,080,718                          | 44,395,019                              | 44,746,243                  | 44,857,821                       | 43,642,146                     |
| Shortest sequence (bp)                | 31,247                       | 28,273              | 33,223                            | 25,840                        | 28,179               | 62,177                  | 60,364                | 62,282                              | 4,693                                   | 31,057                      | 5,656                            | 42,889                         |
| Number of sequences > 500 nt<br>(bp)  | 136<br>(384,714,333)         | 53<br>(381,568,527) | 41<br>(383,971,120)               | 83<br>(382,043,555)           | 128<br>(388,473,696) | 58<br>(397,125,412)     | 111<br>(407,596,313)  | 61<br>(400,990,151)                 | 49<br>(394,174,378)                     | 588<br>(491,646,357)        | 46<br>(391,869,245)              | 26<br>(384,741,818)            |
| Number of sequences > 1k nt<br>(bp)   | 136<br>(384,714,333)         | 53<br>(381,568,527) | 41<br>(383,971,120)               | 83<br>(382,043,555)           | 128<br>(388,473,696) | 58<br>(397,125,412)     | 111<br>(407,596,313)  | 61<br>(400,990,151)                 | 49<br>(394,174,378)                     | 588<br>(491,646,357)        | 46<br>(391,869,245)              | 26<br>(384,741,818)            |
| Number of sequences > 10k nt<br>(bp)  | 136<br>(384,714,333)         | 53<br>(381,568,527) | 41<br>(383,971,120)               | 83<br>(382,043,555)           | 128<br>(388,473,696) | 58<br>(397,125,412)     | 111<br>(407,596,313)  | 61<br>(400,990,151)                 | 45<br>(394,147,392)                     | 588<br>(491,646,357)        | 45<br>(391,863,589)              | 26<br>(384,741,818)            |
| Number of sequences > 100k nt<br>(bp) | 81<br>(381,126,077)          | 32<br>(380,484,904) | 33<br>(383,439,140)               | 49<br>(379,983,247)           | 104<br>(386,879,335) | 47<br>(396,216,074)     | 86<br>(405,526,260)   | 50<br>(400,163,551)                 | 21<br>(392,844,006)                     | 395<br>(475,444,831)        | 18<br>(390,417,465)              | 19<br>(384,284,582)            |
| Number of sequences > 1M nt<br>(bp)   | 48<br>(372,884,715)          | 27<br>(379,478,749) | 20<br>(380,433,420)               | 38<br>(377,675,338)           | 74<br>(371,838,746)  | 16<br>(391,175,705)     | 17<br>(392,624,808)   | 20<br>(394,948,352)                 | 15<br>(391,772,695)                     | 18<br>(395,640,191)         | 15<br>(389,820,951)              | 16<br>(383,720,536)            |
| Mean sequence length (bp)             | 2,828,781                    | 7,199,406           | 9,365,149                         | 4,602,934                     | 3,034,950            | 6,846,989               | 3,672,038             | 6,573,609                           | 8,044,375                               | 836,133                     | 8,518,896                        | 14,797,762                     |
| Median sequence length (bp)           | 1,399,195                    | 1,015,454           | 820,882                           | 176,119                       | 1,470,635            | 141,708                 | 144,367               | 162,420                             | 75,063                                  | 122,237                     | 71,437                           | 15,658,731                     |
| N50 sequence length (bp)              | 11,025,322                   | 22,940,949          | 22,679,302                        | 17,921,520                    | 7,352,909            | 26,007,178              | 27,206,337            | 21,823,919                          | 29,604,901                              | 26,804,887                  | 30,747,645                       | 27,825,079                     |
| L50 sequence count                    | 13                           | 7                   | 7                                 | 9                             | 18                   | 7                       | 7                     | 8                                   | 6                                       | 8                           | 6                                | 6                              |

Supplementary Table 4.

| Variety Name/Length(Mb)          | Chr01 | Chr02 | Chr03 | Chr04 | Chr05 | Chr06 | Chr07 | Chr08 | Chr09 | Chr10 | Chr11 | Chr12 |
|----------------------------------|-------|-------|-------|-------|-------|-------|-------|-------|-------|-------|-------|-------|
| CHAO MEO::IRGC 80273-1           | 44.31 | 36.54 | 37.87 | 35.48 | 30.35 | 30.91 | 29.25 | 28.52 | 23.06 | 23.74 | 28.80 | 28.02 |
| Azucena                          | 44.01 | 36.47 | 38.43 | 34.19 | 30.95 | 31.19 | 29.33 | 29.17 | 23.13 | 25.10 | 30.18 | 27.49 |
| KETAN NANGKA::IRGC 19961-2       | 43.44 | 36.37 | 37.49 | 34.28 | 30.41 | 31.74 | 30.62 | 29.55 | 23.54 | 25.90 | 30.70 | 26.71 |
| ARC 10497::IRGC 12485-1          | 43.68 | 35.92 | 38.38 | 34.33 | 30.57 | 31.84 | 29.53 | 29.51 | 24.22 | 24.63 | 29.24 | 26.63 |
| IR 64                            | 44.35 | 37.11 | 38.83 | 35.28 | 31.01 | 32.15 | 31.20 | 30.18 | 24.27 | 25.56 | 31.22 | 25.54 |
| PR 106::IRGC 53418-1             | 44.39 | 38.15 | 39.18 | 36.99 | 30.84 | 32.21 | 30.66 | 30.03 | 24.98 | 25.71 | 32.03 | 26.01 |
| LIMA::IRGC 81487-1               | 44.96 | 37.90 | 39.45 | 36.94 | 31.25 | 32.48 | 30.74 | 29.29 | 24.05 | 25.77 | 32.42 | 27.37 |
| KHAO YAI GUANG::IRGC 65972-1     | 44.76 | 37.53 | 40.37 | 36.89 | 31.27 | 32.08 | 30.27 | 29.25 | 25.34 | 25.44 | 32.70 | 27.83 |
| GOBOL SAIL (BALAM)::IRGC 26624-2 | 44.40 | 37.06 | 39.50 | 37.68 | 30.84 | 32.49 | 30.32 | 29.60 | 24.95 | 25.67 | 31.75 | 27.50 |
| LIU XU::IRGC 109232-1            | 44.75 | 37.64 | 39.28 | 37.89 | 30.94 | 32.35 | 29.70 | 30.91 | 24.01 | 25.46 | 32.30 | 26.80 |
| LARHA MUGAD::IRGC 52339-1        | 44.86 | 36.83 | 39.14 | 36.68 | 30.75 | 32.76 | 30.44 | 29.62 | 24.43 | 25.26 | 32.11 | 27.34 |
| NATEL BORO::IRGC 34749-1         | 43.64 | 37.78 | 38.83 | 35.33 | 31.01 | 31.93 | 29.23 | 29.95 | 23.59 | 25.10 | 31.31 | 26.02 |

Supplementary Table 5.

| Variety Name                 | CHAO<br>MEO::IRGC<br>80273-1 | Azucena | KETAN<br>NANGKA::I<br>RGC 19961- | ARC<br>10497::IRGC<br>12485-1 | IR 64  | PR<br>106::IRGC<br>53418-1 | LIMA::IRGC<br>81487-1 | KHAO YAI<br>GUANG::IR<br>GC 65972-1 | GOBOL<br>SAIL<br>(BALAM)::I | LIU<br>XU::IRGC<br>109232-1 | LARHA<br>MUGAD::IR<br>GC 52339-1 | NATEL<br>BORO::IRG<br>C 34749-1 |
|------------------------------|------------------------------|---------|----------------------------------|-------------------------------|--------|----------------------------|-----------------------|-------------------------------------|-----------------------------|-----------------------------|----------------------------------|---------------------------------|
| Count                        | 24                           | 17      | 22                               | 22                            | 18     | 22                         | 22                    | 27                                  | 24                          | 56                          | 37                               | 18                              |
| Min length (Mbp)             | 0.41                         | 0.62    | 0.39                             | 0.29                          | 0.56   | 0.63                       | 0.58                  | 0.46                                | 0.47                        | 0.51                        | 0.75                             | 0.61                            |
| Median length (Mbp)          | 17.35                        | 23.91   | 20.01                            | 19.26                         | 24.25  | 18.26                      | 19.38                 | 13.87                               | 17.99                       | 3.36                        | 3.15                             | 22.37                           |
| Mean length (Mbp)            | 15.98                        | 22.65   | 17.93                            | 17.51                         | 21.93  | 18.25                      | 18.55                 | 15.38                               | 16.65                       | 9.01                        | 11.67                            | 21.55                           |
| N50 length (Mbp)             | 22.75                        | 26.69   | 26.75                            | 25.29                         | 26.66  | 27.06                      | 26.45                 | 31.45                               | 25.99                       | 22.30                       | 27.09                            | 25.96                           |
| Max length (Mbp)             | 35.93                        | 38.49   | 34.48                            | 32.16                         | 39.40  | 39.28                      | 37.32                 | 40.84                               | 37.90                       | 31.18                       | 36.59                            | 35.77                           |
| Total length (Mbp)           | 383.45                       | 385.08  | 394.42                           | 385.13                        | 394.76 | 401.43                     | 408.06                | 415.35                              | 399.52                      | 504.52                      | 431.94                           | 387.98                          |
| Mapping Ratio (Contigs/Maps) | 100.00                       | 99.09   | 97.30                            | 99.24                         | 98.14  | 98.62                      | 100.00                | 96.46                               | 98.51                       | 97.59                       | 90.40                            | 98.31                           |

Supplementary Table 6.

| Variety Name<br>(subpopulation)             | SV      | Nipponbare<br>(GJ-temp) | CHAO<br>MEO::IRGC<br>80273-1<br>(GJ-subtrp) | Azucena<br>(GJ-trop1) | KETAN<br>NANGKA::IRGC<br>19961-2<br>(GJ-trop2) | ARC<br>10497::IRGC<br>12485-1<br>(cB) | PR 106::IRGC<br>53418-1<br>(XI-1B2) | Minghui 63<br>(XI-adm) | IR 64<br>(XI-1B1) | Zhenshan 97<br>(XI-1A) | LIMA::IRGC<br>81487-1<br>(XI-3A) | KHAO YAI<br>GUANG::IRGC<br>65972-1<br>(XI-3B1) | GOBOL SAIL<br>(BALAM)::IRGC<br>26624-2<br>(XI-2A) | LIU XU::IRGC<br>109232-1<br>(XI-3B2) | LARHA<br>MUGAD::IRGC<br>52339-1<br>(XI-2B) | N 22::IRGC 19379-<br>1<br>(cA1) | NATEL<br>BORO::IRGC<br>34749-1<br>(cA2) |
|---------------------------------------------|---------|-------------------------|---------------------------------------------|-----------------------|------------------------------------------------|---------------------------------------|-------------------------------------|------------------------|-------------------|------------------------|----------------------------------|------------------------------------------------|---------------------------------------------------|--------------------------------------|--------------------------------------------|---------------------------------|-----------------------------------------|
| Nipponbare<br>(GJ-temp)                     | Number  | -                       |                                             |                       |                                                |                                       |                                     |                        |                   |                        |                                  |                                                |                                                   |                                      |                                            |                                 |                                         |
|                                             | Size/Mb | -                       |                                             |                       |                                                |                                       |                                     |                        |                   |                        |                                  |                                                |                                                   |                                      |                                            |                                 |                                         |
| CHAO MEO::IRGC 80273-1<br>(GJ-subtrp)       | Number  | 13,530                  | -                                           |                       |                                                |                                       |                                     |                        |                   |                        |                                  |                                                |                                                   |                                      |                                            |                                 |                                         |
|                                             | Size/Mb | 19.06                   | -                                           |                       |                                                |                                       |                                     |                        |                   |                        |                                  |                                                |                                                   |                                      |                                            |                                 |                                         |
| Azucena<br>(GJ-trop1)                       | Number  | 15,227                  | 12,626                                      | -                     |                                                |                                       |                                     |                        |                   |                        |                                  |                                                |                                                   |                                      |                                            |                                 |                                         |
|                                             | Size/Mb | 21.27                   | 17.94                                       | -                     |                                                |                                       |                                     |                        |                   |                        |                                  |                                                |                                                   |                                      |                                            |                                 |                                         |
| KETAN NANGKA::IRGC 19961-2<br>(GJ-trop2)    | Number  | 16,516                  | 15,381                                      | 13,401                | -                                              |                                       |                                     |                        |                   |                        |                                  |                                                |                                                   |                                      |                                            |                                 |                                         |
|                                             | Size/Mb | 23.07                   | 21.66                                       | 18.55                 | -                                              |                                       |                                     |                        |                   |                        |                                  |                                                |                                                   |                                      |                                            |                                 |                                         |
| ARC 10497::IRGC 12485-1<br>(cB)             | Number  | 20,532                  | 19,224                                      | 19,337                | 19,654                                         | -                                     |                                     |                        |                   |                        |                                  |                                                |                                                   |                                      |                                            |                                 |                                         |
|                                             | Size/Mb | 26.82                   | 25.65                                       | 26.78                 | 27.16                                          | -                                     |                                     |                        |                   |                        |                                  |                                                |                                                   |                                      |                                            |                                 |                                         |
| PR 106::IRGC 53418-1<br>(XI-1B2)            | Number  | 29,490                  | 28,286                                      | 28,018                | 27,680                                         | 27,051                                | -                                   |                        |                   |                        |                                  |                                                |                                                   |                                      |                                            |                                 |                                         |
|                                             | Size/Mb | 39.16                   | 38.61                                       | 38.39                 | 39.54                                          | 36.61                                 | -                                   |                        |                   |                        |                                  |                                                |                                                   |                                      |                                            |                                 |                                         |
| Minghui 63<br>(XI-adm)                      | Number  | 29,560                  | 28,664                                      | 27,993                | 27,866                                         | 27,961                                | 12,567                              | -                      |                   |                        |                                  |                                                |                                                   |                                      |                                            |                                 |                                         |
|                                             | Size/Mb | 39.21                   | 38.38                                       | 38.38                 | 38.88                                          | 39.33                                 | 19.62                               | -                      |                   |                        |                                  |                                                |                                                   |                                      |                                            |                                 |                                         |
| IR 64<br>(XI-1B1)                           | Number  | 30,236                  | 29,042                                      | 28,568                | 28,132                                         | 27,577                                | 11,346                              | 14,231                 | -                 |                        |                                  |                                                |                                                   |                                      |                                            |                                 |                                         |
|                                             | Size/Mb | 39.64                   | 39.06                                       | 39.26                 | 39.66                                          | 38.31                                 | 17.57                               | 23.72                  | -                 |                        |                                  |                                                |                                                   |                                      |                                            |                                 |                                         |
| Zhenshan 97<br>(XI-1A)                      | Number  | 29,338                  | 28,478                                      | 28,070                | 27,705                                         | 26,985                                | 14,686                              | 16,467                 | 15,023            | -                      |                                  |                                                |                                                   |                                      |                                            |                                 |                                         |
|                                             | Size/Mb | 39.96                   | 39.81                                       | 40.71                 | 40.27                                          | 38.46                                 | 23.99                               | 26.02                  | 23.77             | -                      |                                  |                                                |                                                   |                                      |                                            |                                 |                                         |
| LIMA::IRGC 81487-1<br>(XI-3A)               | Number  | 30,606                  | 29,594                                      | 29,341                | 28,411                                         | 28,083                                | 16,882                              | 15,598                 | 16,440            | 17,576                 | -                                |                                                |                                                   |                                      |                                            |                                 |                                         |
|                                             | Size/Mb | 40.32                   | 39.79                                       | 40.43                 | 40.57                                          | 39.51                                 | 26.69                               | 25.75                  | 24.89             | 28.76                  | -                                |                                                |                                                   |                                      |                                            |                                 |                                         |
| KHAO YAI GUANG::IRGC 65972-1<br>(XI-3B1)    | Number  | 31,160                  | 30,026                                      | 29,549                | 29,344                                         | 28,568                                | 15,697                              | 14,477                 | 16,398            | 16,532                 | 14,467                           | -                                              |                                                   |                                      |                                            |                                 |                                         |
|                                             | Size/Mb | 41.54                   | 40.63                                       | 41.37                 | 42.15                                          | 40.66                                 | 25.30                               | 22.18                  | 26.86             | 28.33                  | 23.41                            | -                                              |                                                   |                                      |                                            |                                 |                                         |
| GOBOL SAIL (BALAM)::IRGC 26624-2<br>(XI-2A) | Number  | 30,865                  | 29,947                                      | 29,403                | 29,140                                         | 27,857                                | 16,000                              | 15,292                 | 15,684            | 16,778                 | 14,693                           | 14,398                                         | -                                                 |                                      |                                            |                                 |                                         |
|                                             | Size/Mb | 41.02                   | 40.75                                       | 40.56                 | 41.51                                          | 39.06                                 | 25.22                               | 24.40                  | 25.45             | 27.91                  | 23.57                            | 23.50                                          | -                                                 |                                      |                                            |                                 |                                         |
| LIU XU::IRGC 109232-1<br>(XI-3B2)           | Number  | 32,002                  | 31,022                                      | 30,806                | 30,416                                         | 29,422                                | 17,928                              | 18,033                 | 18,149            | 17,381                 | 18,113                           | 17,793                                         | 18,041                                            | -                                    |                                            |                                 |                                         |
|                                             | Size/Mb | 41.03                   | 40.34                                       | 40.96                 | 40.79                                          | 39.24                                 | 25.83                               | 26.19                  | 25.62             | 25.94                  | 25.75                            | 26.38                                          | 26.79                                             | -                                    |                                            |                                 |                                         |
| LARHA MUGAD::IRGC 52339-1<br>(XI-2B)        | Number  | 33,364                  | 32,549                                      | 31,962                | 31,695                                         | 30,746                                | 19,682                              | 20,556                 | 20,489            | 20,070                 | 20,663                           | 20,141                                         | 19,477                                            | 21,956                               | -                                          |                                 |                                         |
|                                             | Size/Mb | 41.19                   | 39.99                                       | 39.95                 | 40.65                                          | 38.17                                 | 26.59                               | 28.49                  | 28.19             | 28.84                  | 28.55                            | 28.94                                          | 26.56                                             | 28.14                                | -                                          |                                 |                                         |
| N 22::IRGC 19379-1<br>(cA1)                 | Number  | 29,317                  | 28,677                                      | 27,851                | 28,291                                         | 26,367                                | 23,365                              | 23,987                 | 23,423            | 23,480                 | 24,152                           | 24,087                                         | 22,967                                            | 25,437                               | 25,239                                     | -                               |                                         |
|                                             | Size/Mb | 39.54                   | 39.25                                       | 39.04                 | 40.09                                          | 35.67                                 | 35.80                               | 37.42                  | 36.17             | 37.32                  | 37.81                            | 38.85                                          | 36.50                                             | 38.32                                | 35.76                                      | -                               |                                         |
| NATEL BORO::IRGC 34749-1<br>(cA2)           | Number  | 34,908                  | 34,302                                      | 34,004                | 34,295                                         | 32,015                                | 29,623                              | 29,401                 | 29,209            | 29,944                 | 29,809                           | 29,528                                         | 28,308                                            | 31,302                               | 30,840                                     | 20,265                          | -                                       |
|                                             | Size/Mb | 39.54                   | 39.73                                       | 39.24                 | 39.89                                          | 36.59                                 | 38.90                               | 38.33                  | 39.64             | 40.63                  | 40.23                            | 40.51                                          | 37.94                                             | 40.10                                | 36.50                                      | 23.88                           | -                                       |

Subpopulations: GJ = *Geng-japonica* where temp = temperate, subtrp = subtropical, trop = tropical; cB = *circum*-Basmati; XI = *Xian*-indica; adm = admixed; cA = *circum*-Aus

Supplementary Figure 1

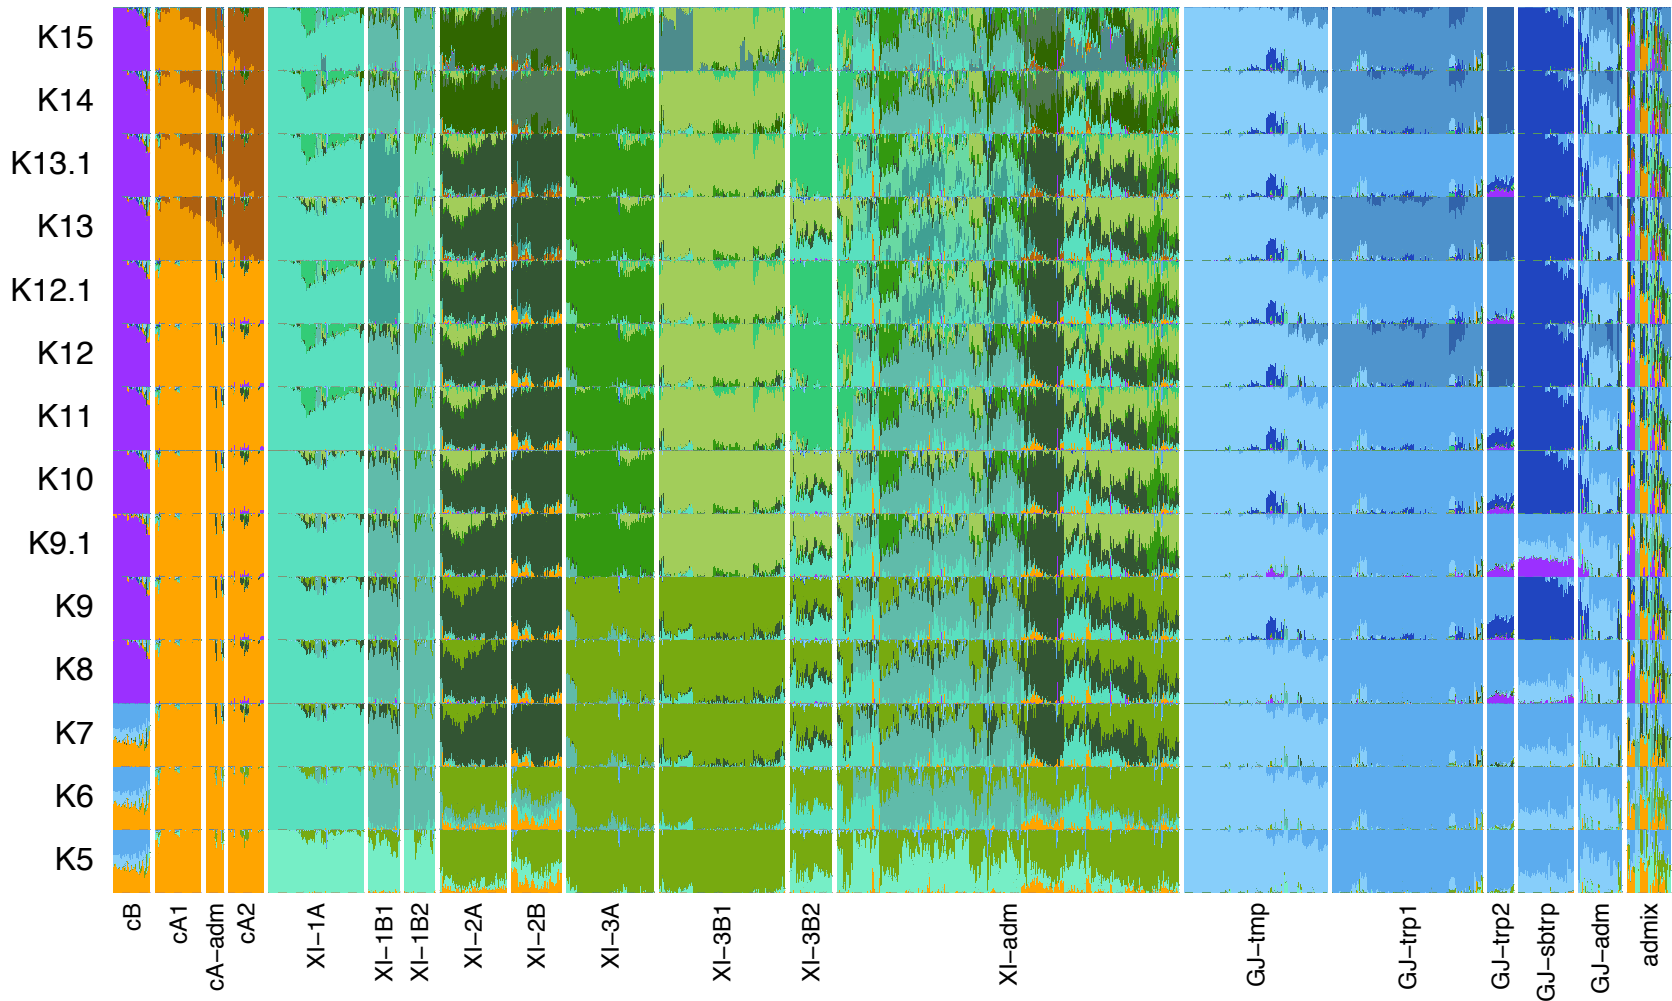



## Supplementary Figure 2

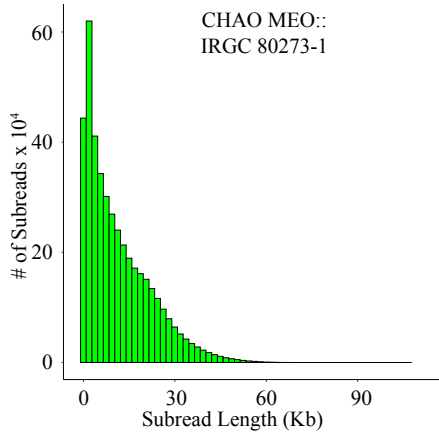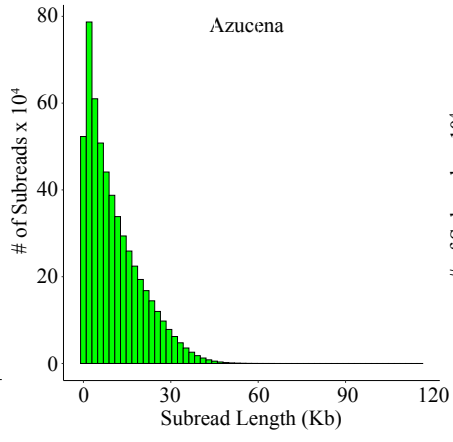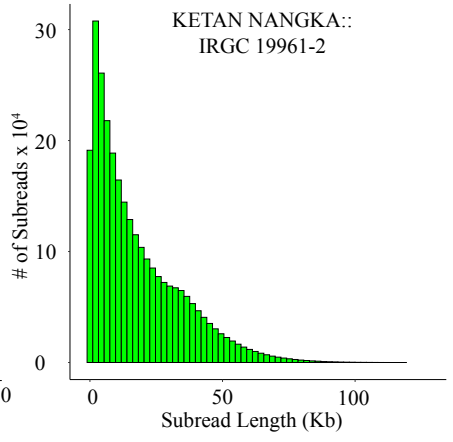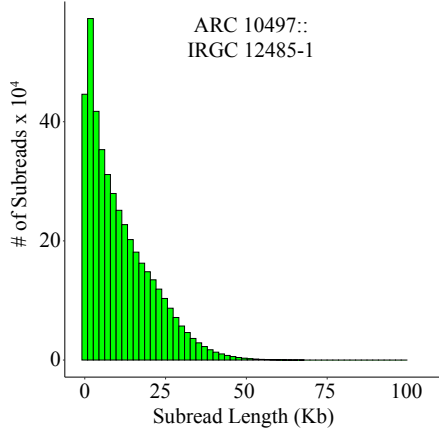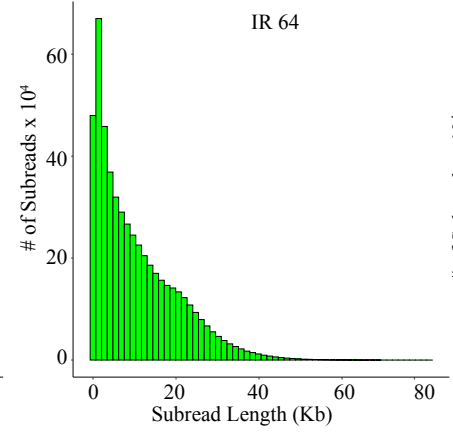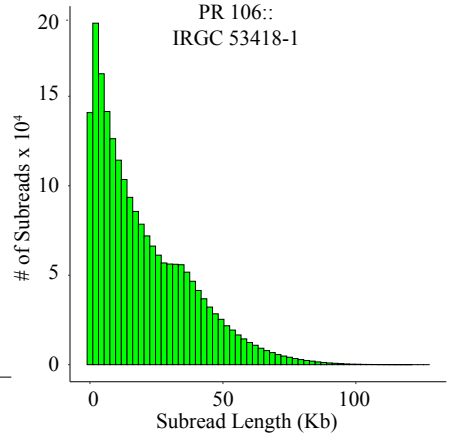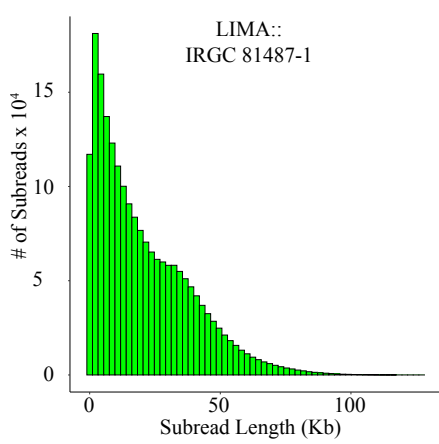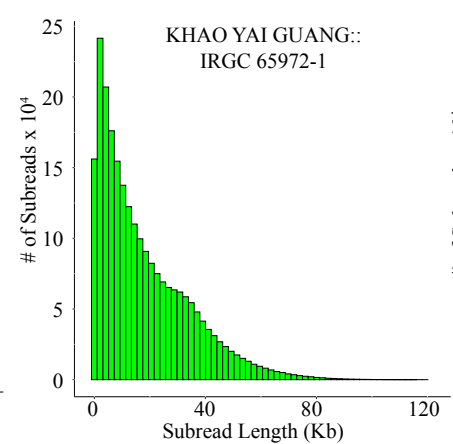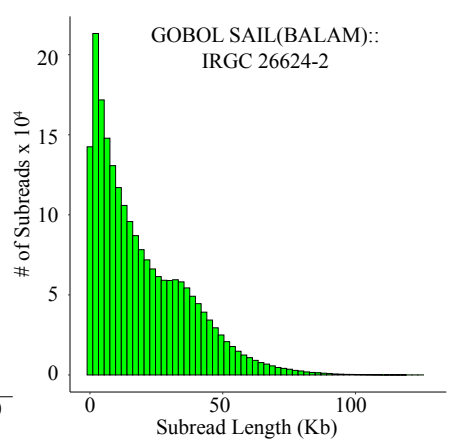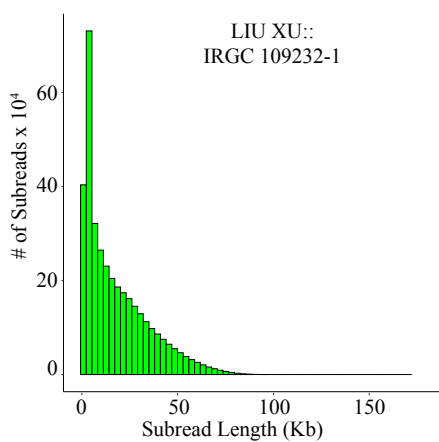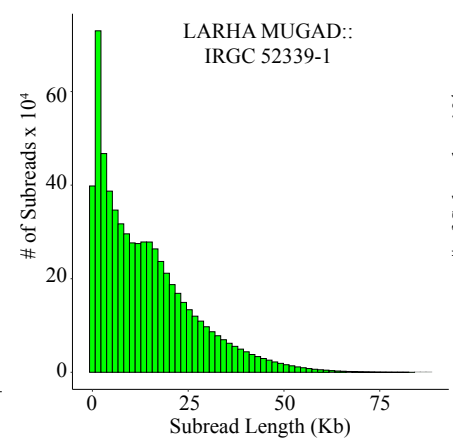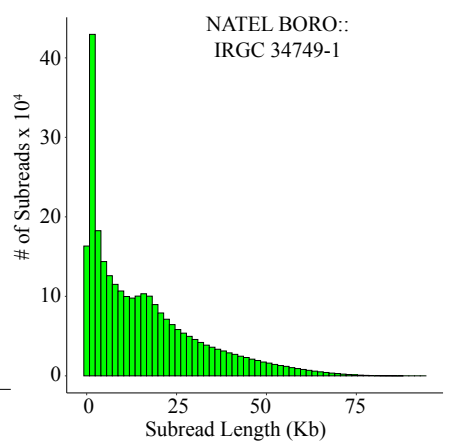

# Supplementary Figure 3

CHAO MEO::  
IRGC 80273-1

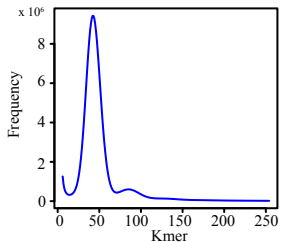

Azucena

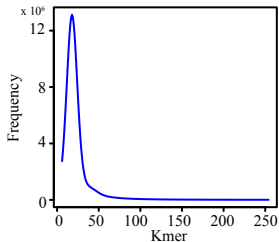

KETAN NANGKA::  
IRGC 19961-2

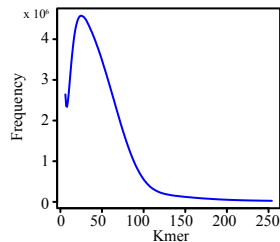

ARC 10497::  
IRGC 12485-1

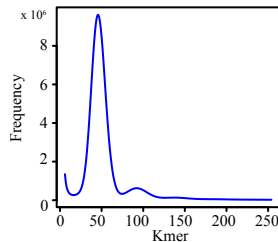

IR64

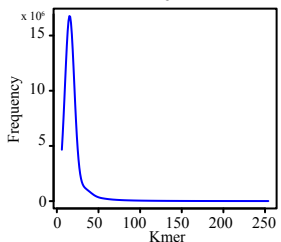

PR 106::  
IRGC 53418-1

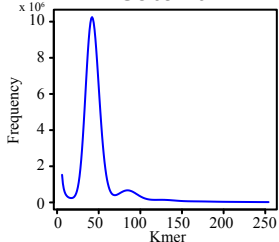

LIMA::  
IRGC 81487-1

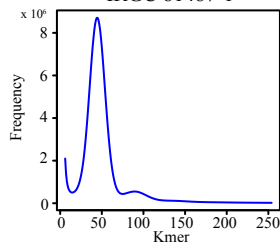

KHAO YAI GUANG::  
IRGC 65972-1

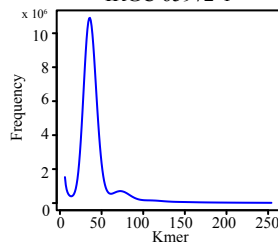

GOBOL SAIL(BALAM)::  
IRGC 26624-2

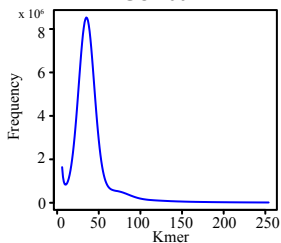

LIU XU::  
IRGC 109232-1

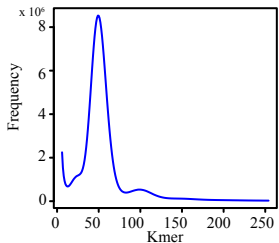

LARHA MUGAD::  
IRGC 52339-1

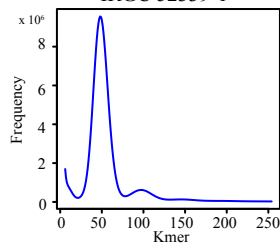

NATEL BORO::  
IRGC 34749-1

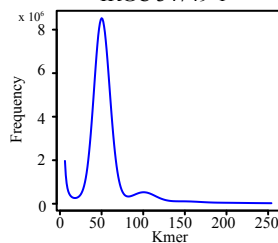

# Supplementary Figure 4a. CHAO MEO::IRGC 80273-1

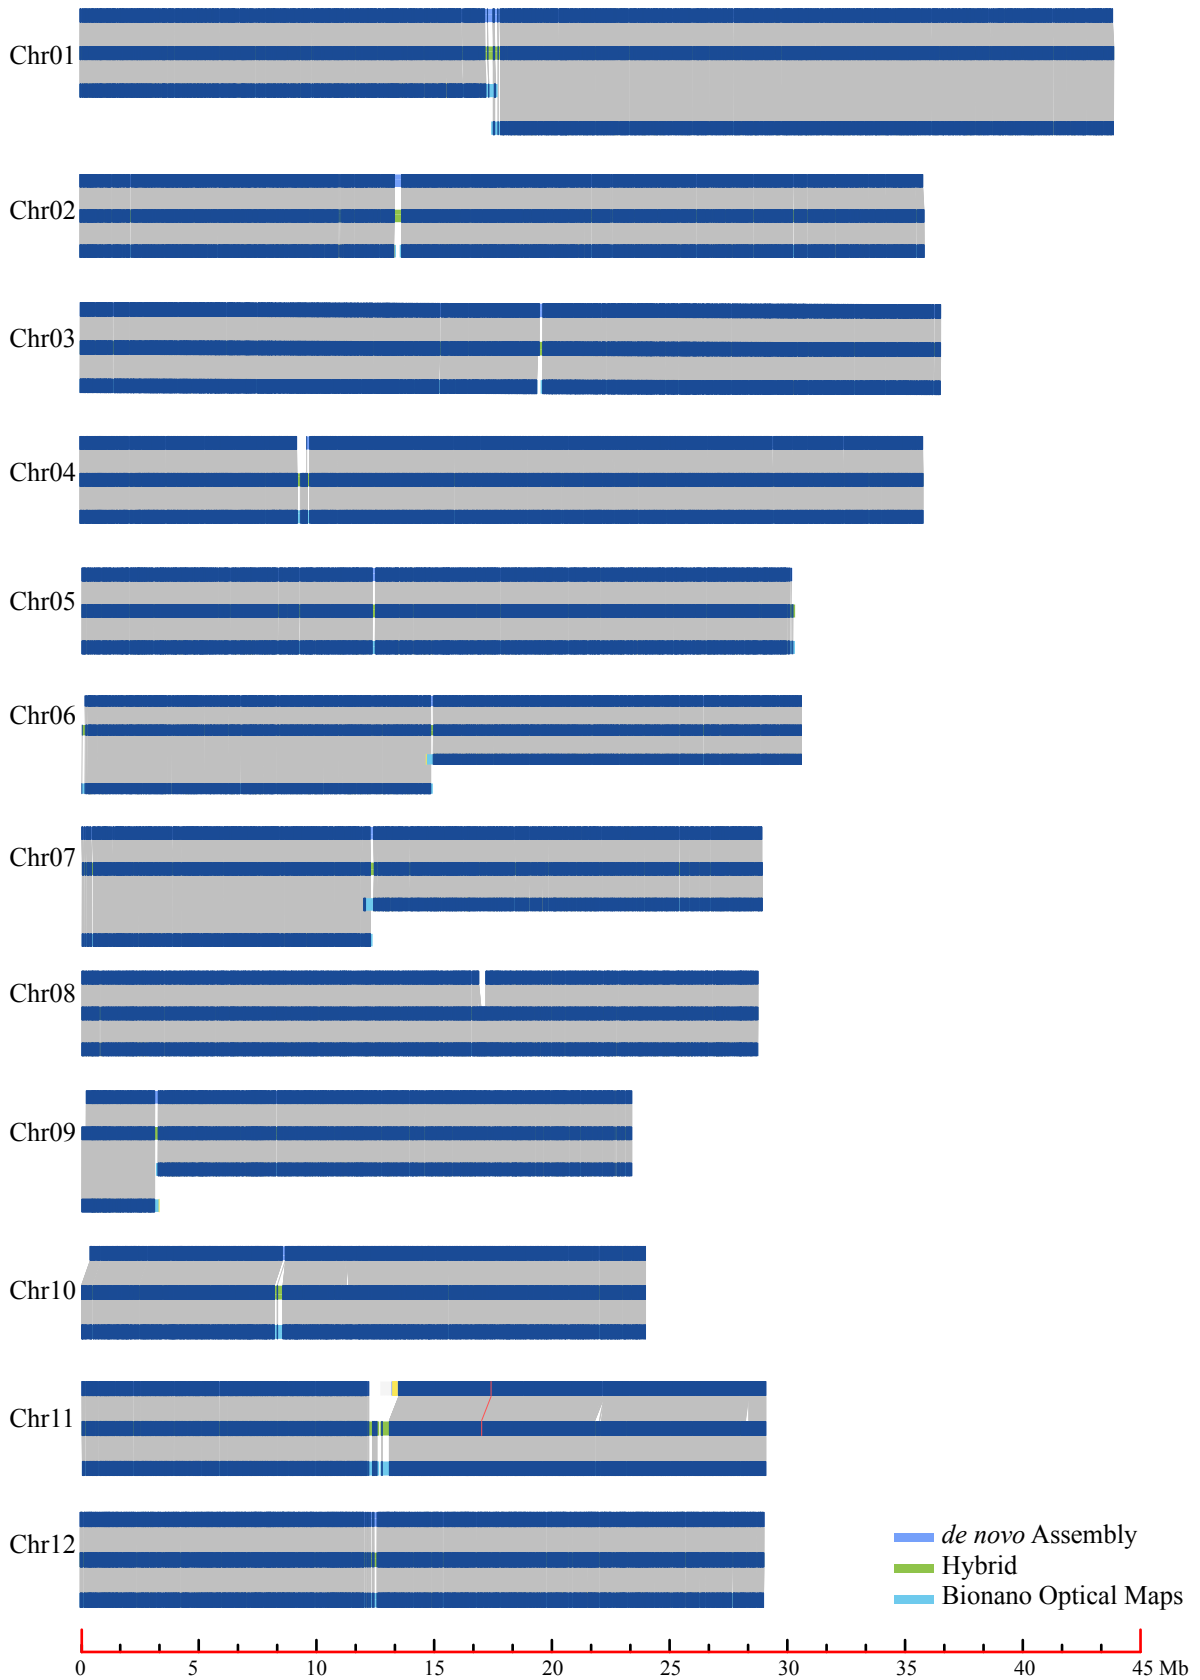

# Supplementary Figure 4b. Azucena

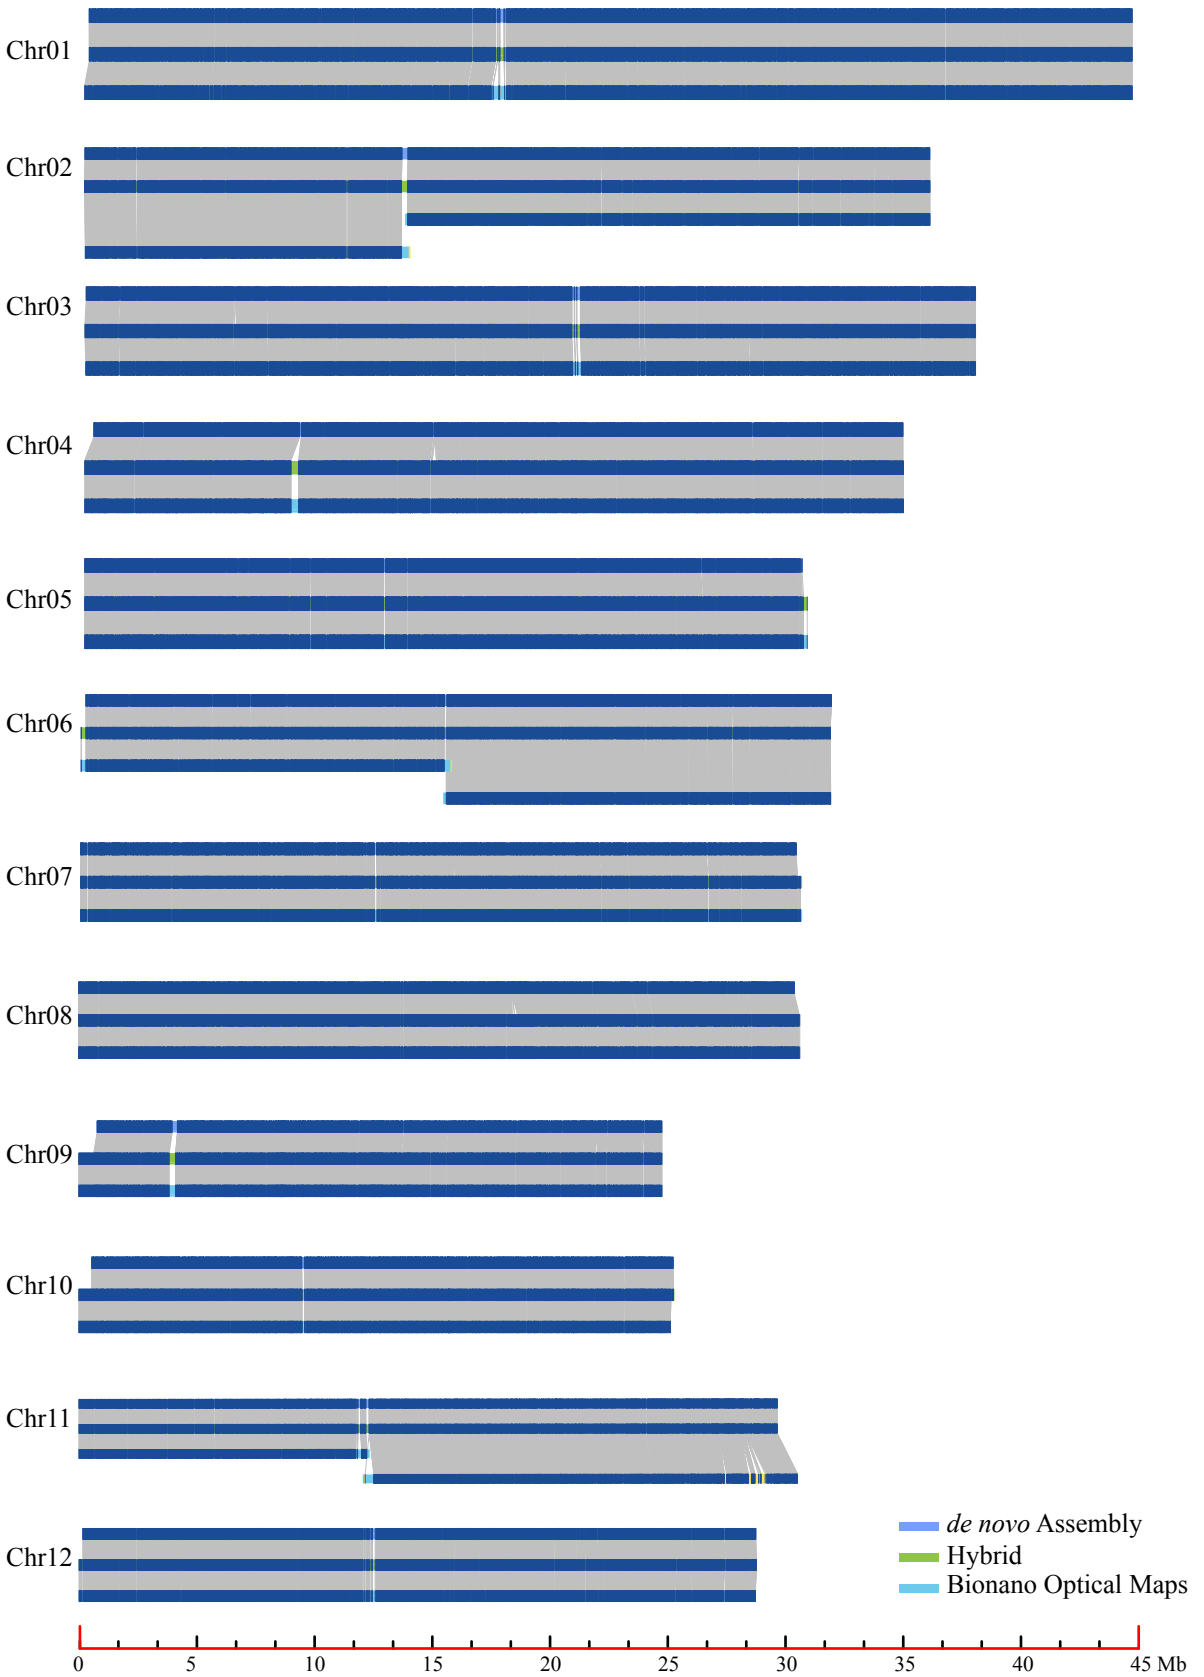

# Supplementary Figure 4c. KETAN NANGKA::IRGC 19961-2

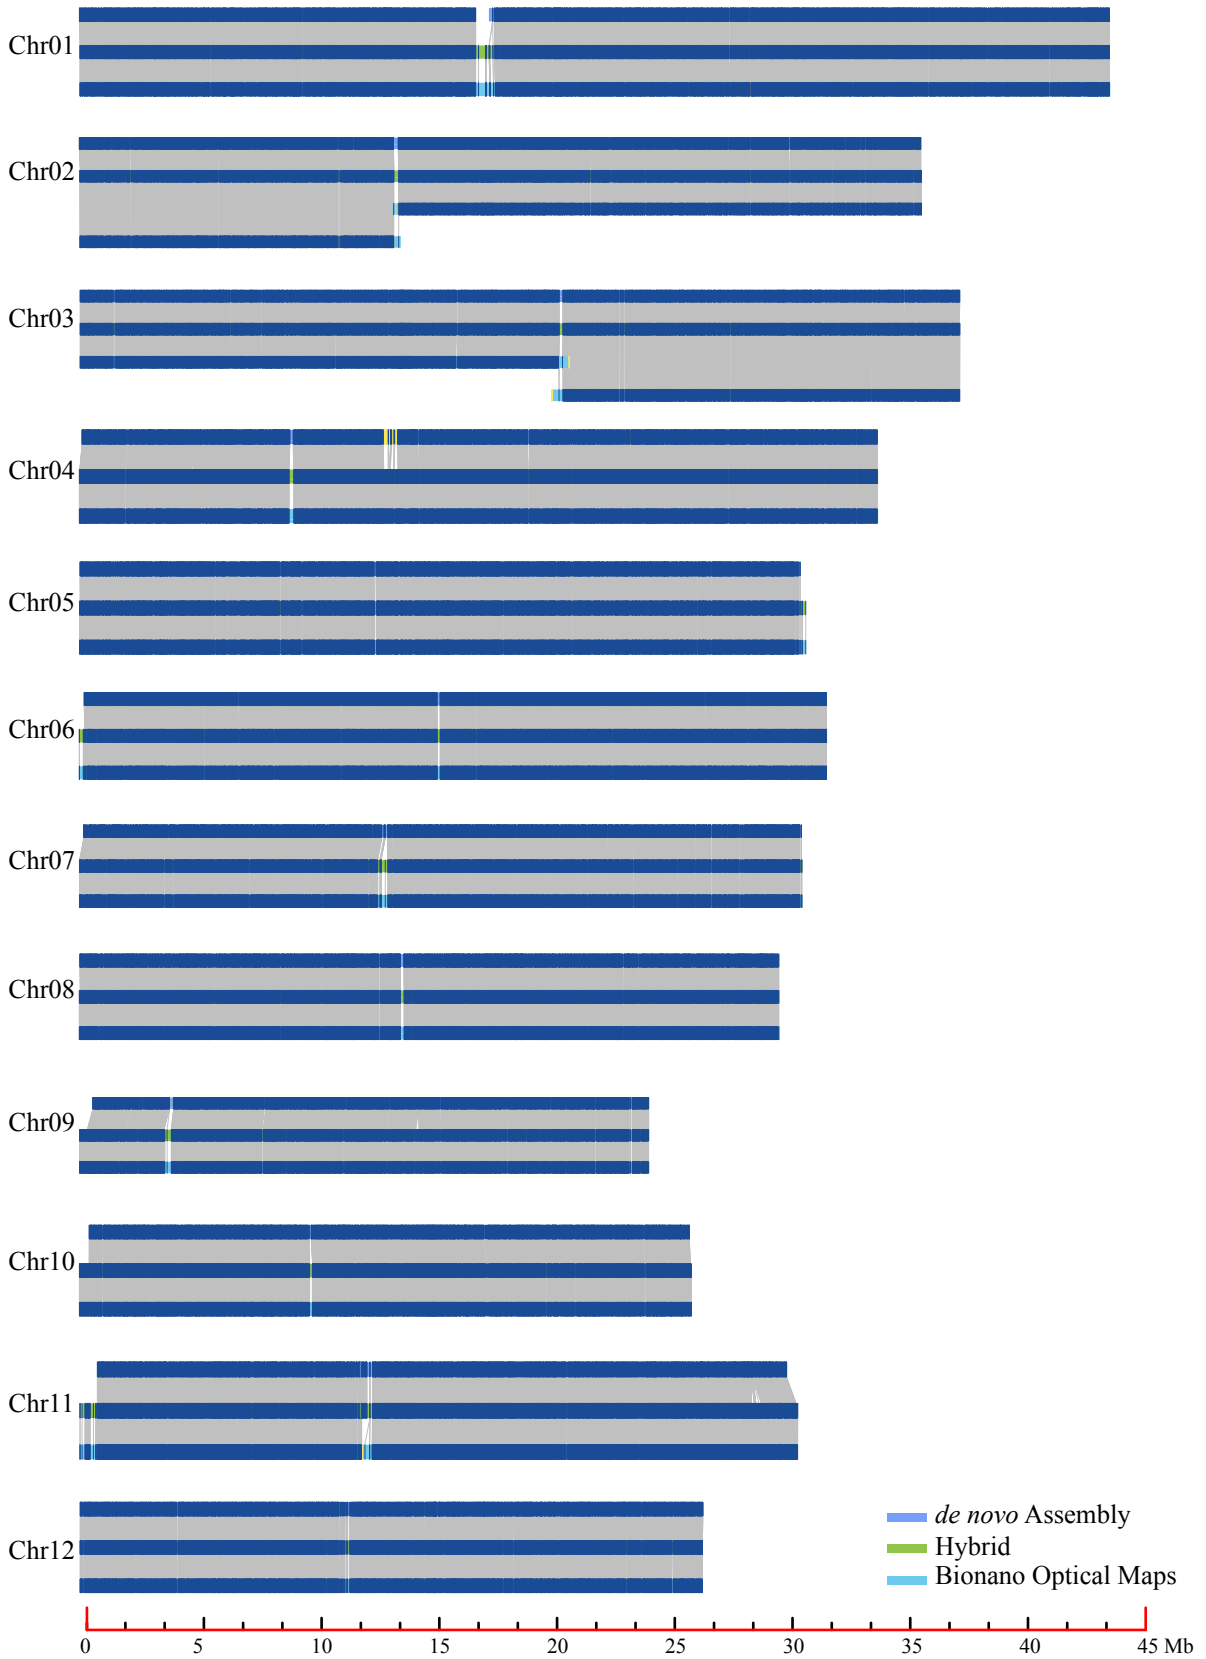

# Supplementary Figure 4d. ARC 10497::IRGC 12485-1

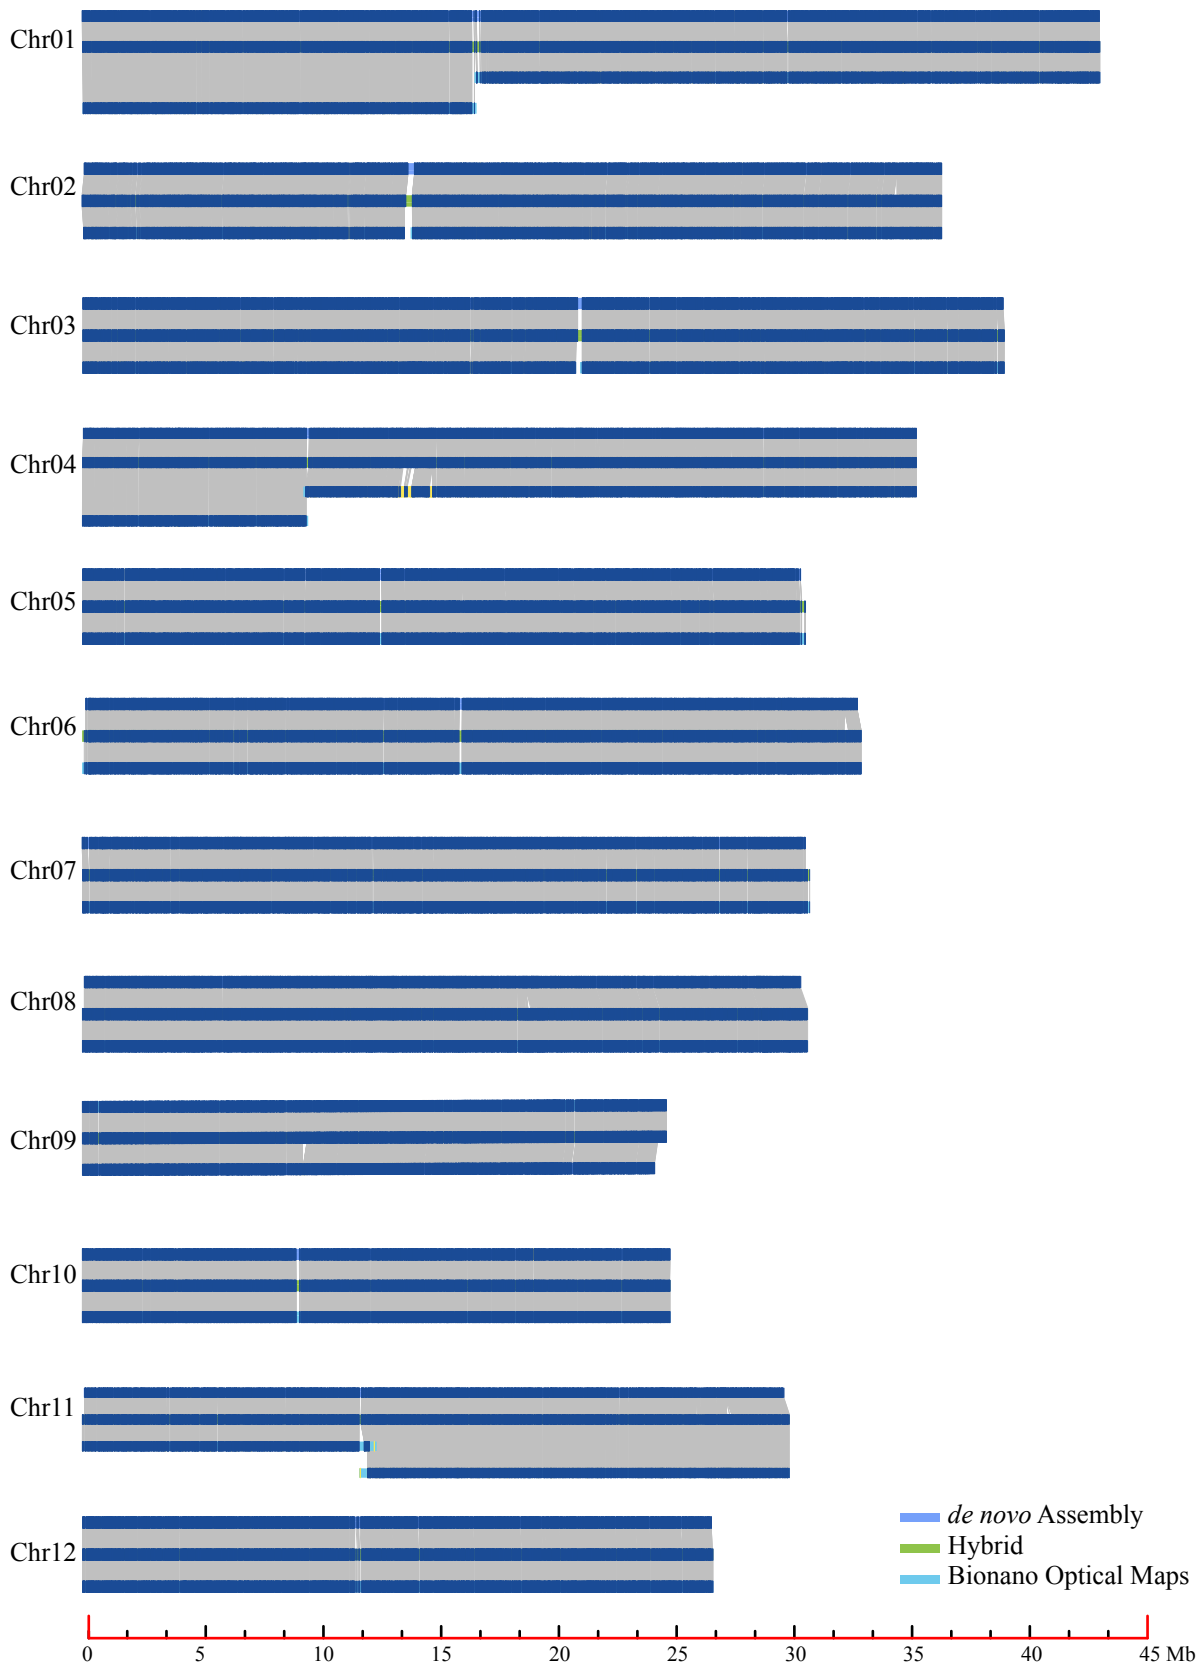

# Supplementary Figure 4e. IR64

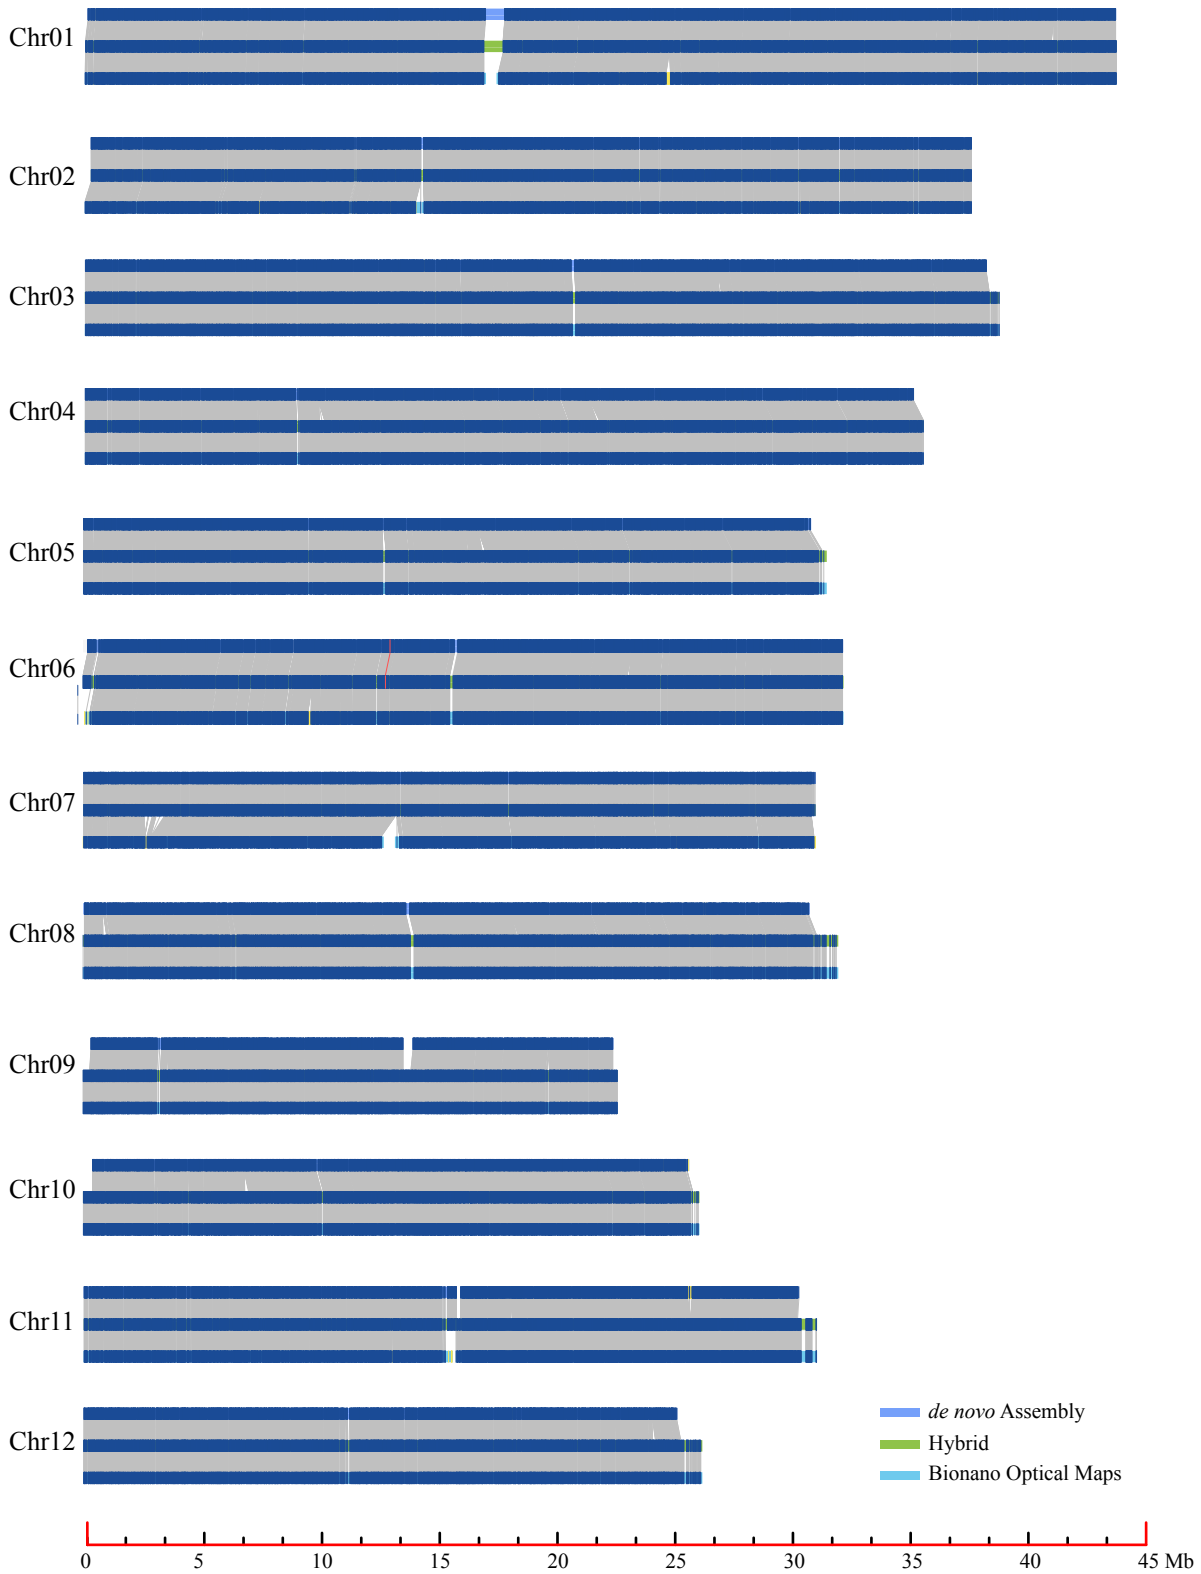

# Supplementary Figure 4f. PR 106::IRGC 53418-1

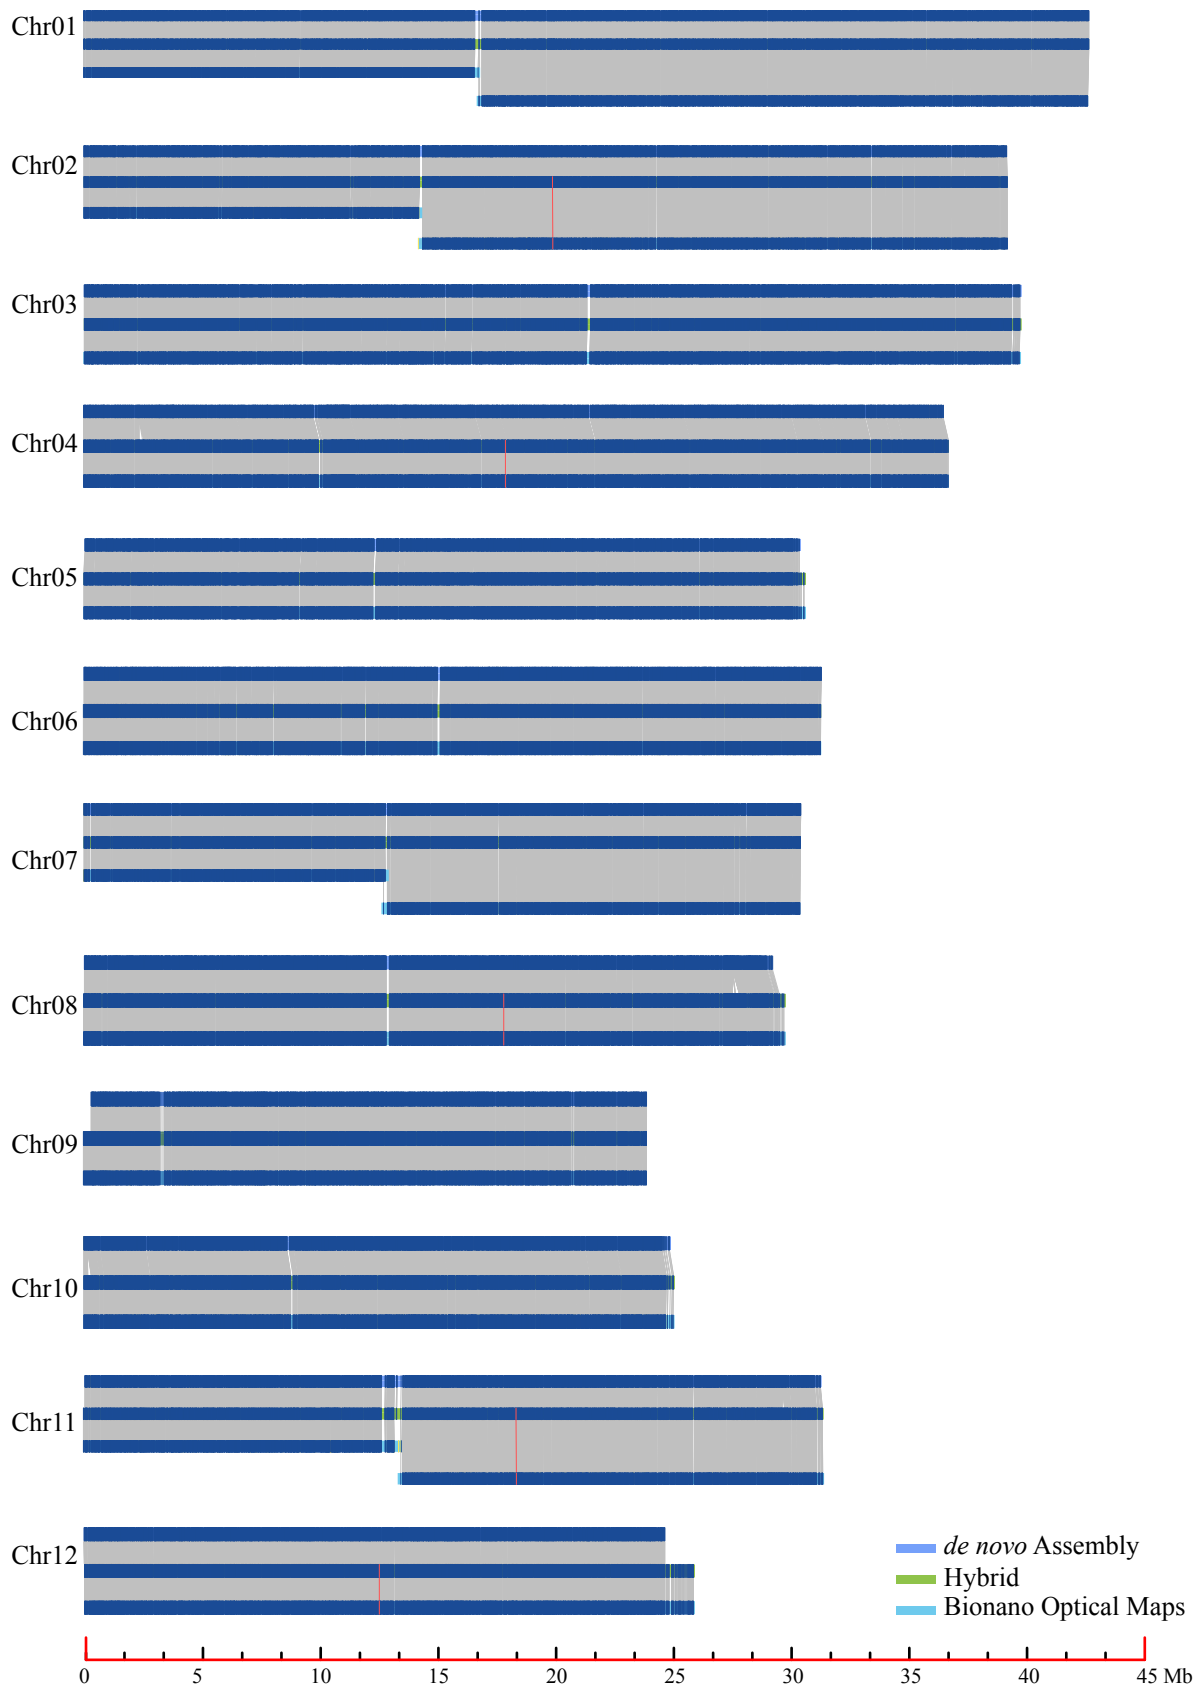



# Supplementary Figure 4g. LIMA::IRGC 81487-1

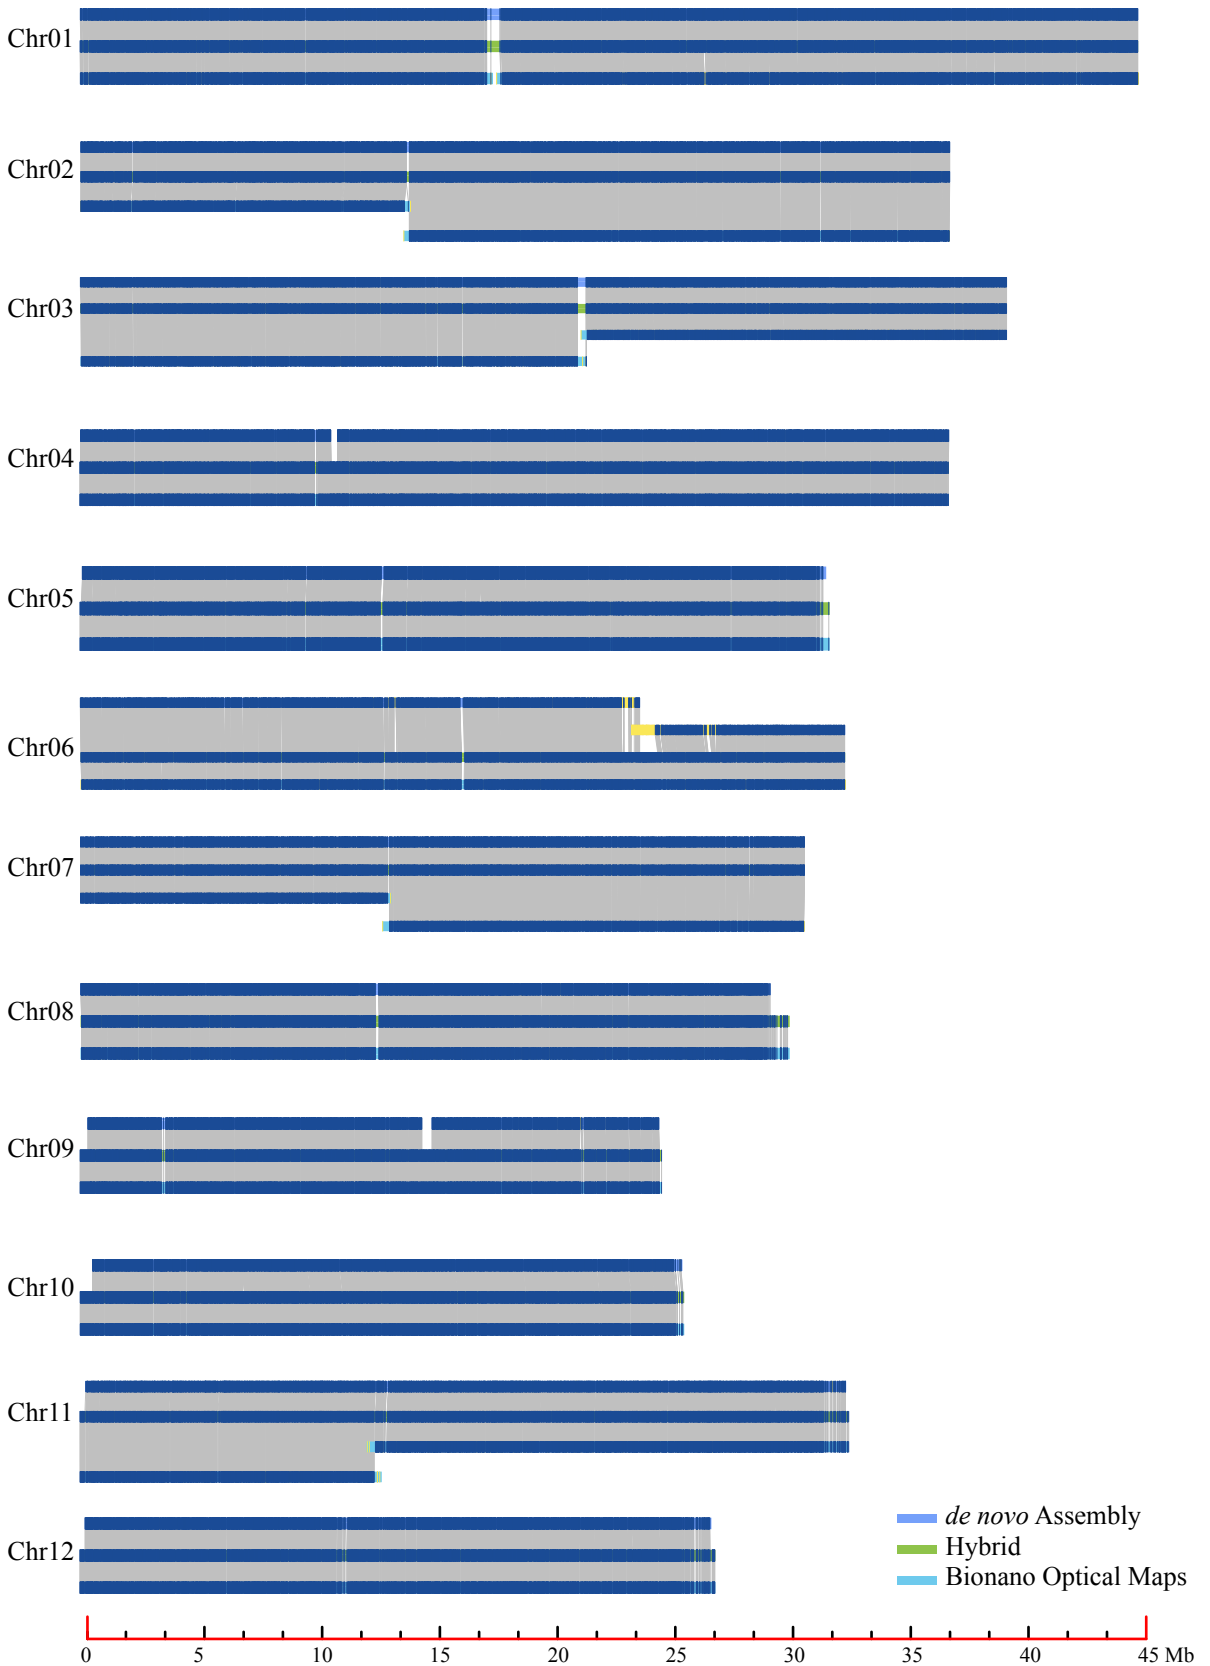

# Supplementary Figure 4h. KHAO YAI GUANG::IRGC 65972-1

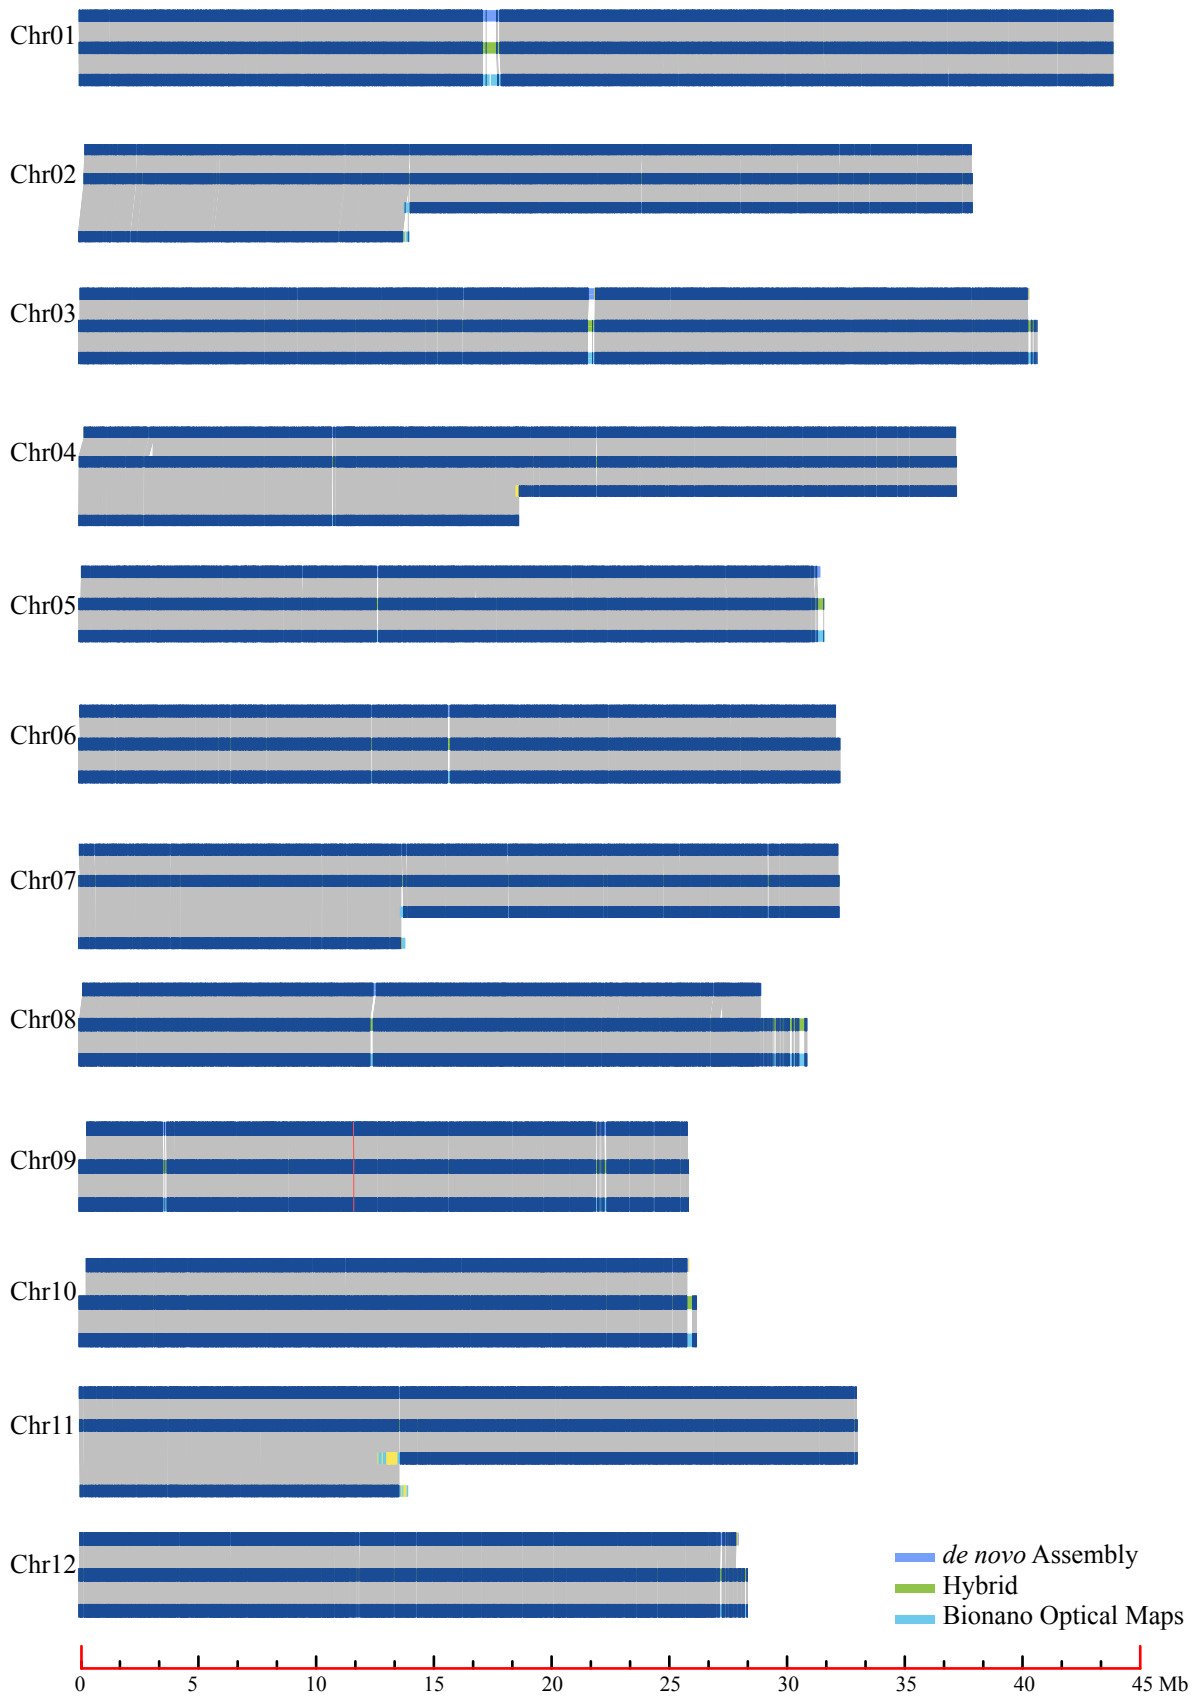

# Supplementary Figure 4i. GOBOL SAIL (BALAM)::IRGC 26624-2

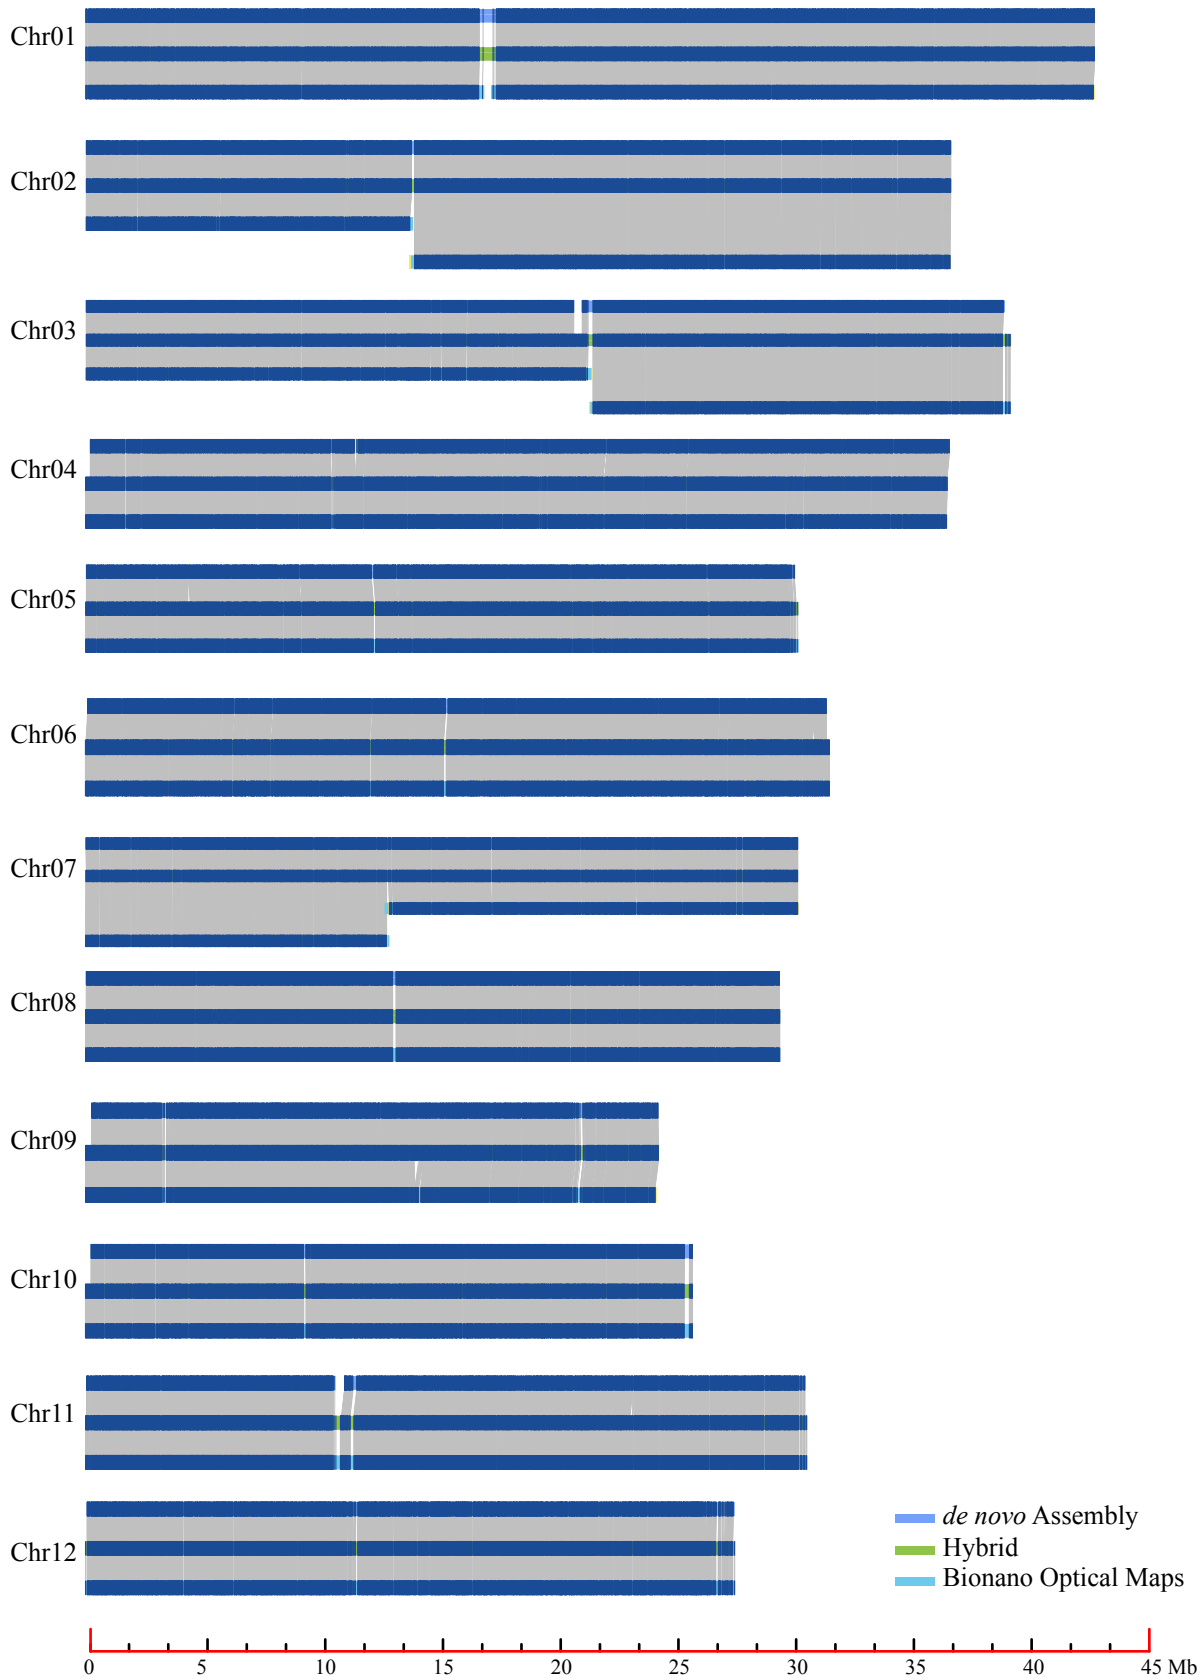

# Supplementary Figure 4j. LIU XU::IRGC 109232-1

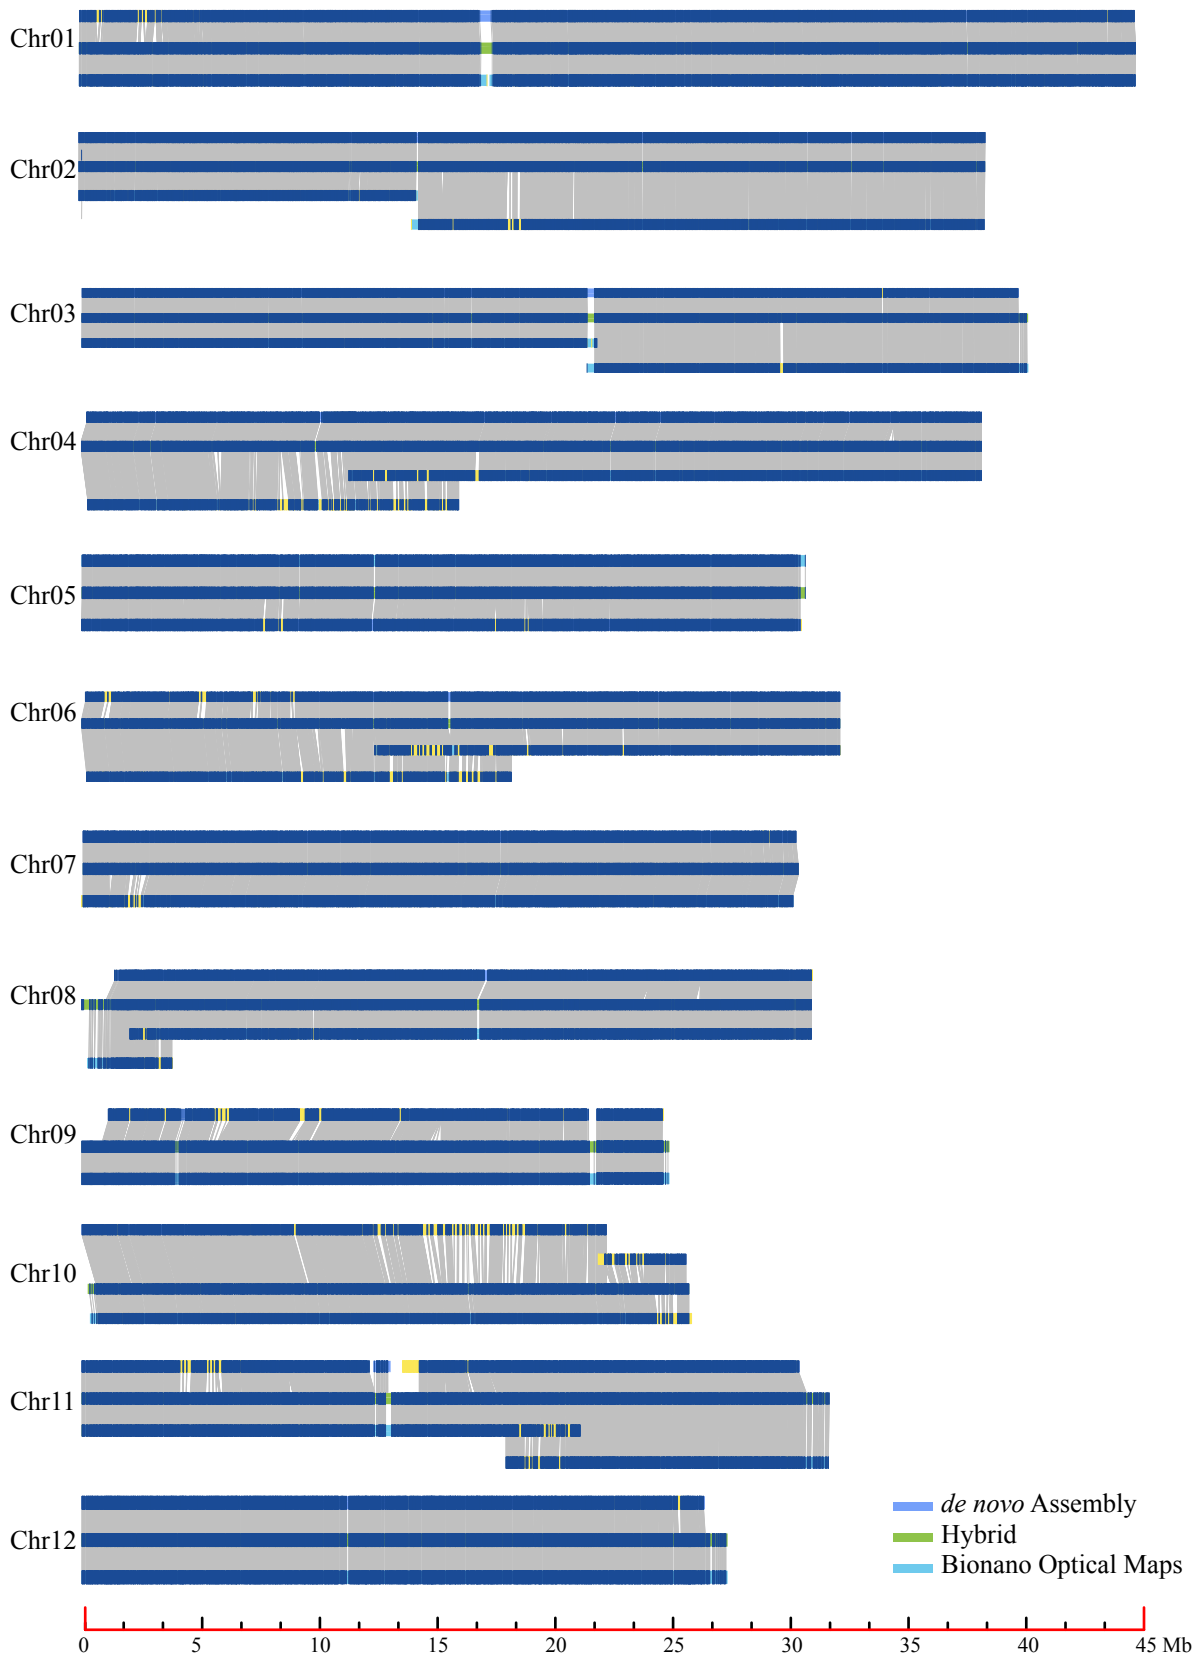

# Supplementary Figure 4k. LARHA MUGAD::

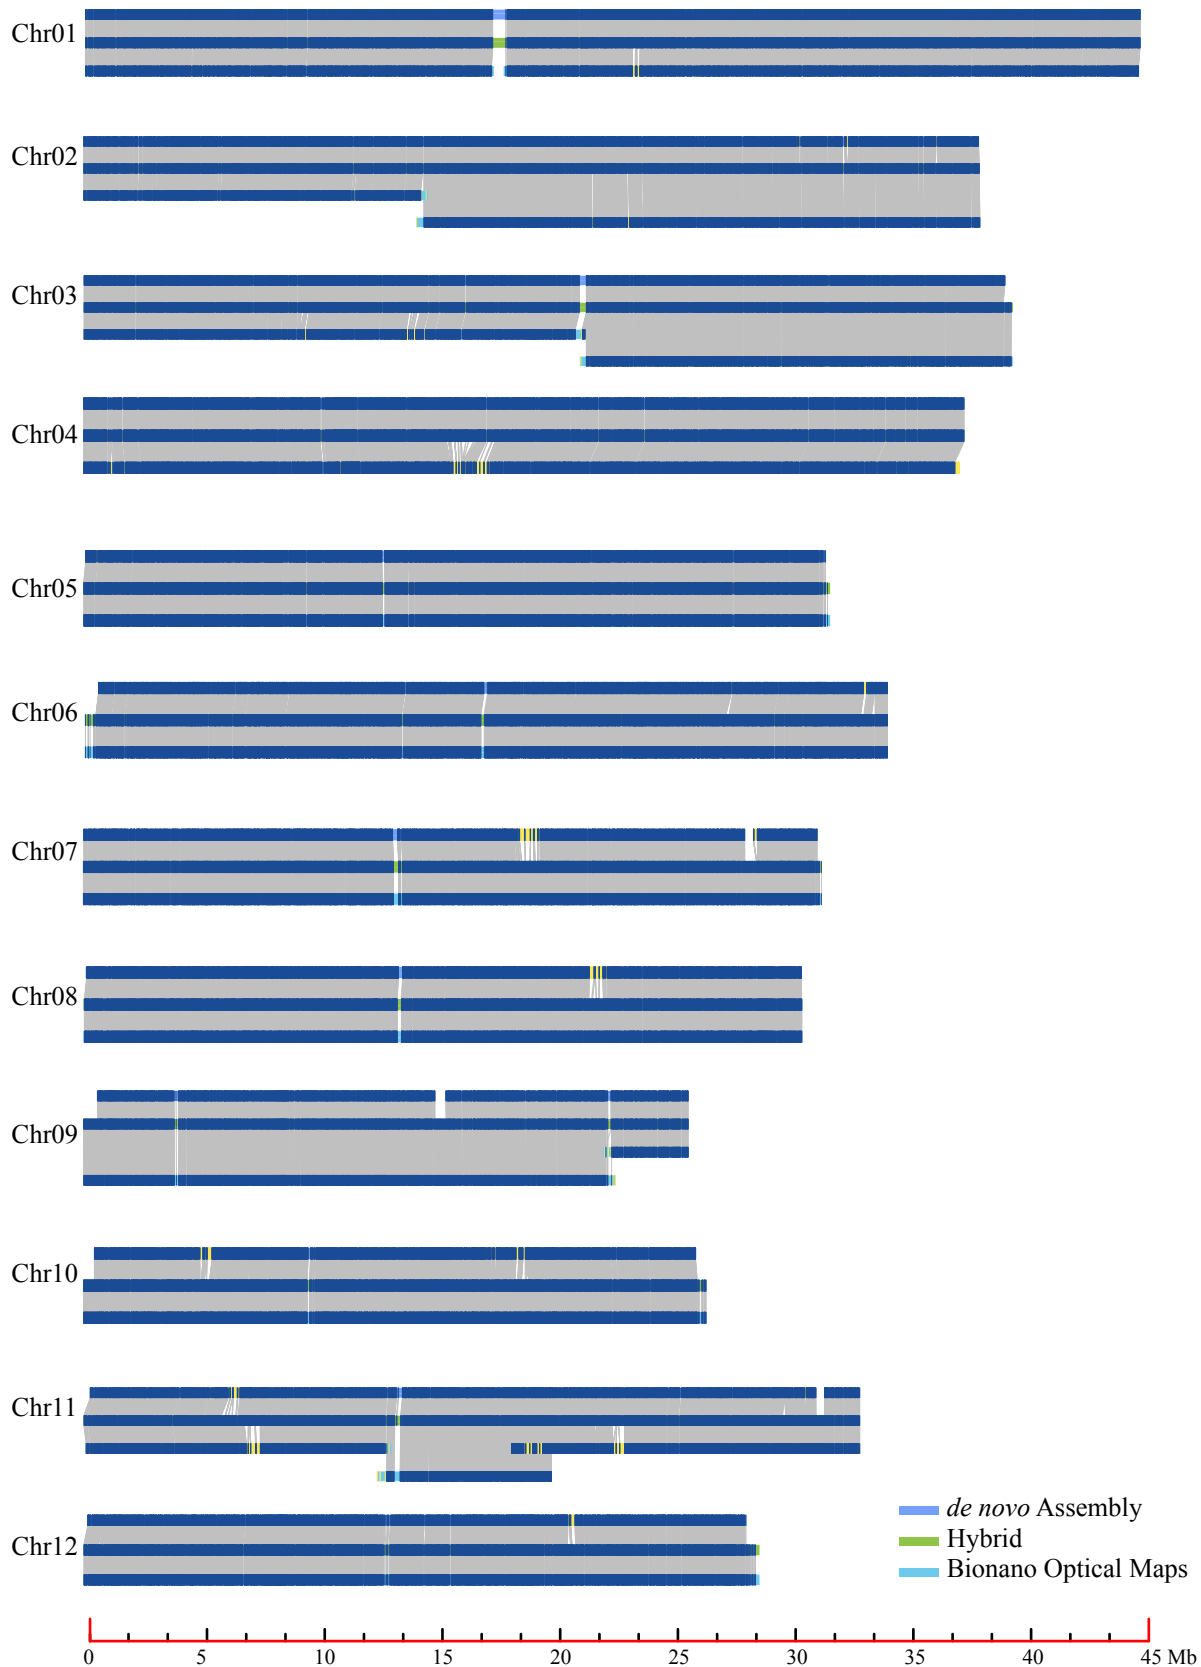

# Supplementary Figure 4I. NATEL BORO::IRGC 34749-1

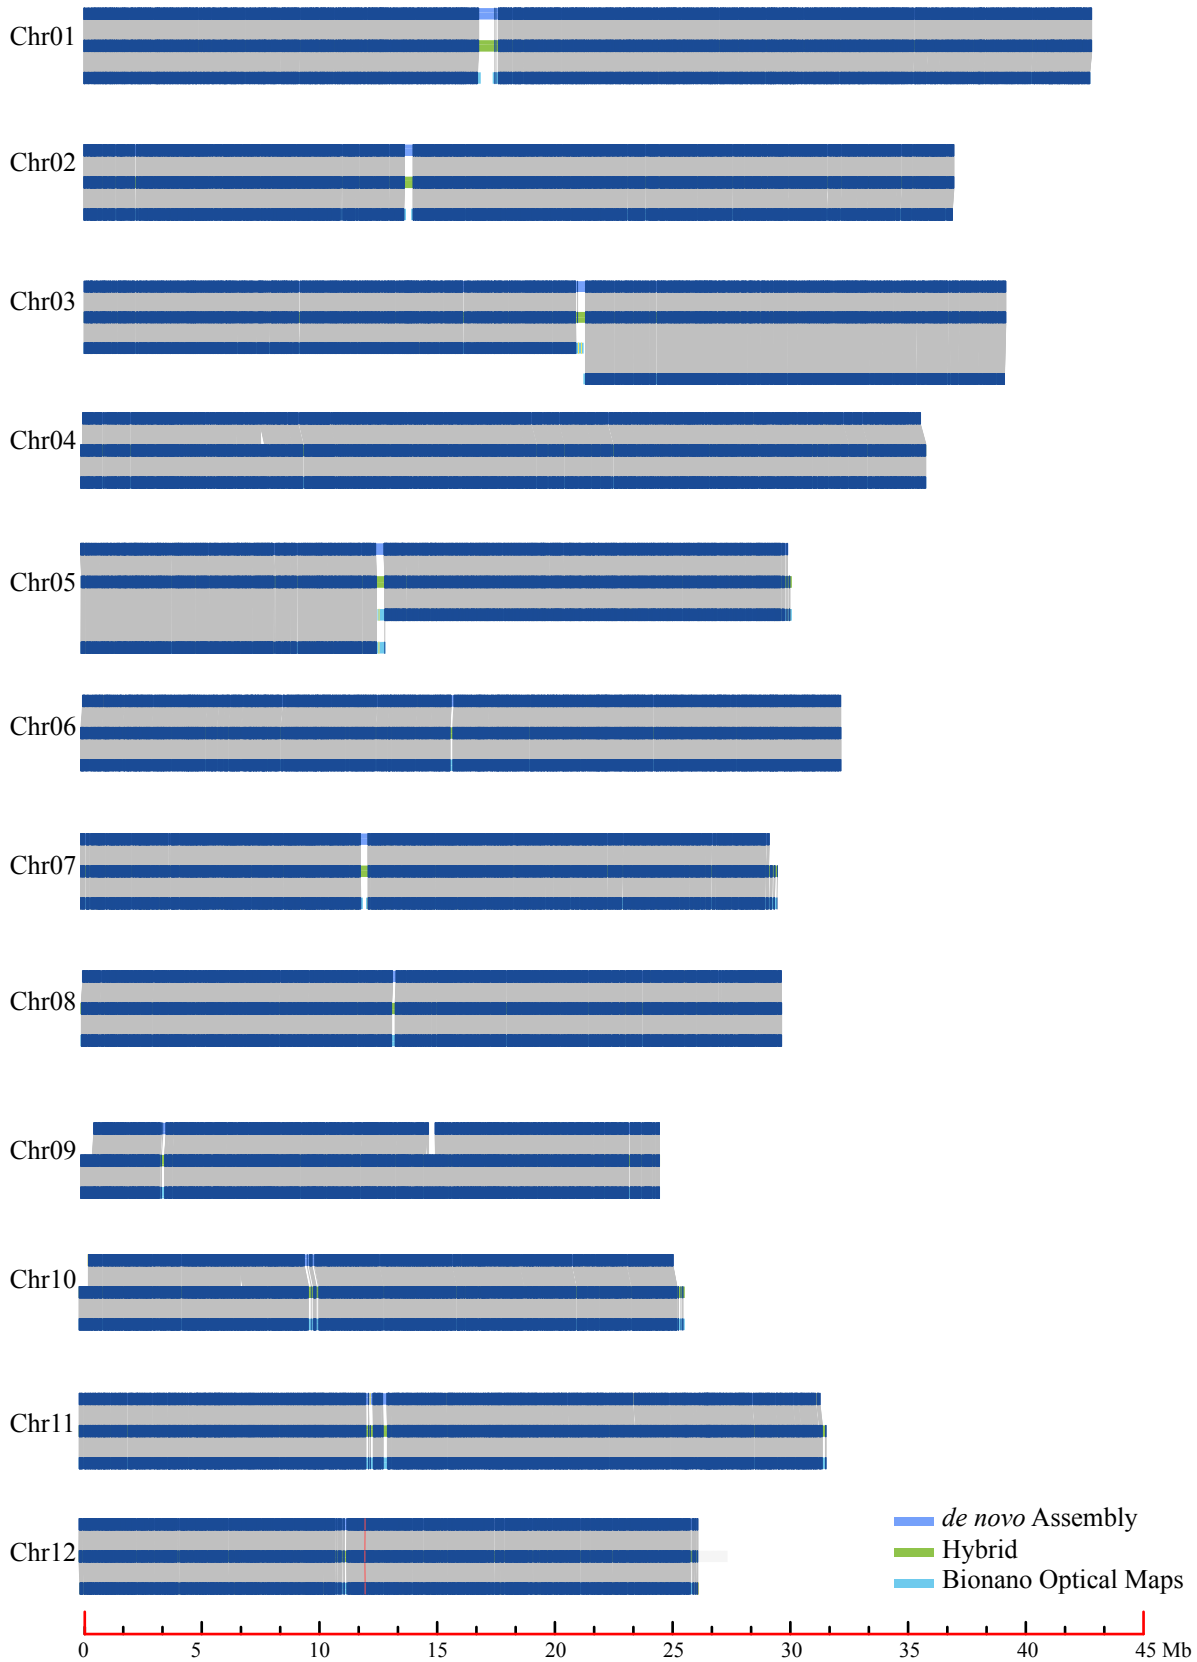

# Supplementary Figure 5

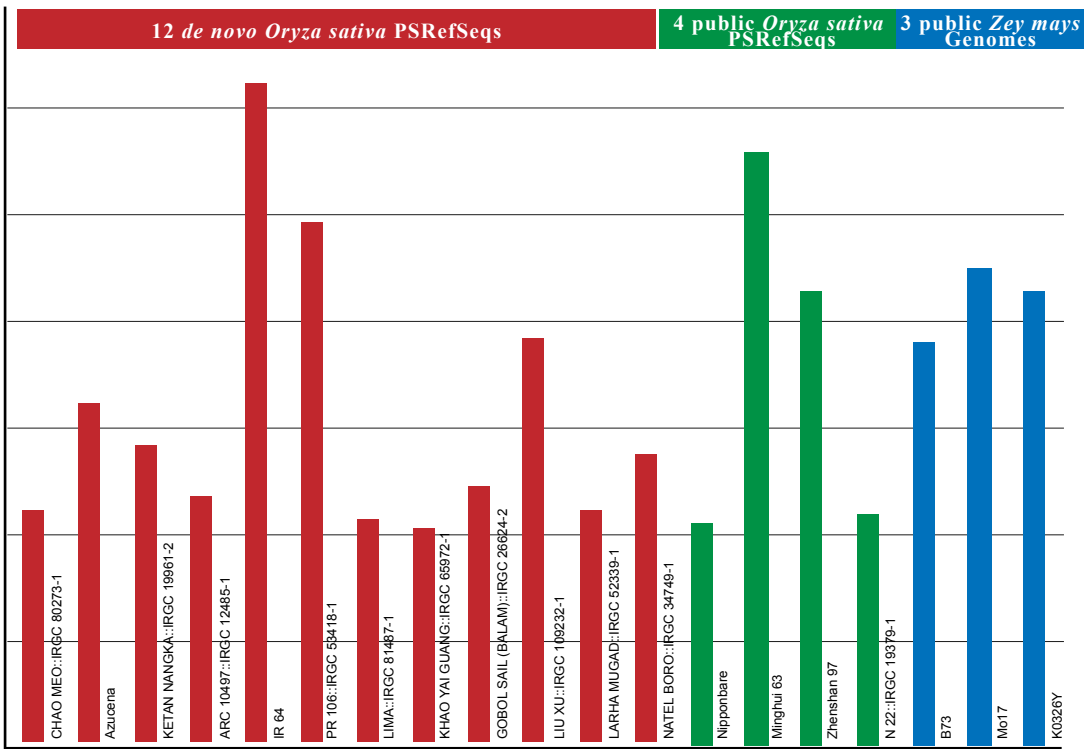

EOG093605AK  
EOG093606SW  
EOG093601AL  
EOG093603UO  
EOG093603VZ  
EOG0936041Q  
EOG093608FN  
EOG0936091T  
EOG093609SU  
EOG09360AW4  
EOG09360AWY  
EOG09360BID  
EOG09360CFL  
EOG09360CH3  
EOG09360MYG  
EOG09360TV2

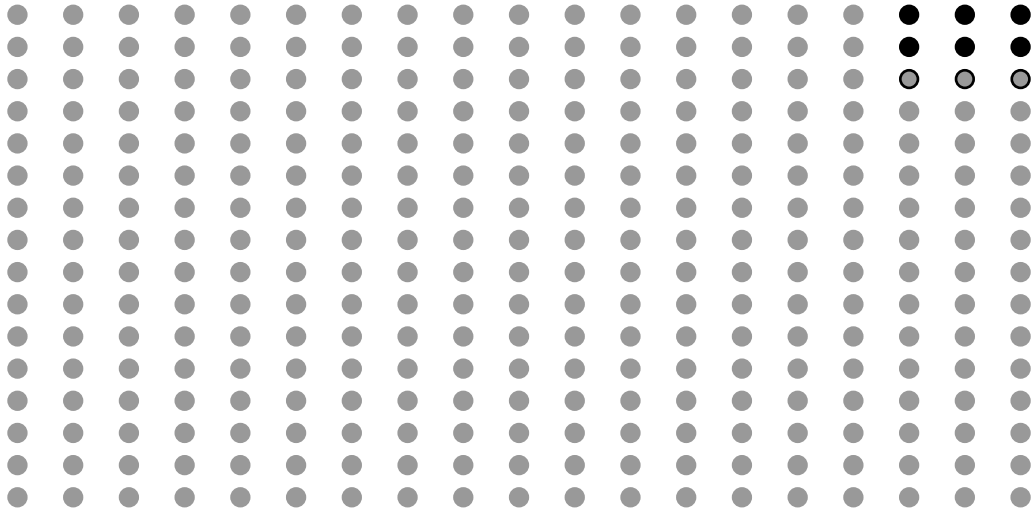

● Complete BUSCOs   ● Fragmented BUSCOs   ● Missing BUSCOs
